# Supplementary material for: Benchmarking 13 tools for mutational signature attribution, including a new and improved algorithm
Source: PubMed Central journal article supplement (PMC11798676; doi:10.1093/bib/bbaf042), 2025-02-06
Supplement: jiang-wu-rozen-sup-figs-2024-12-29_bbaf042.pdf [file jiang-wu-rozen-sup-figs-2024-12-29_bbaf042.pdf]

# Supplementary Figures for

## Benchmarking 13 tools for mutational signature attribution, including a new and improved algorithm

Nanhai Jiang<sup>1,2</sup>, Yang Wu<sup>1,2</sup>, Steven G. Rozen<sup>1,2,3\*</sup>

<sup>1</sup> Centre for Computational Biology, Duke-NUS Medical School, Singapore 169857, Singapore

<sup>2</sup> Programme in Cancer and Stem Cell Biology, Duke-NUS Medical School, Singapore 169857, Singapore

<sup>3</sup> Department of Biostatistics and Bioinformatics, Duke University School of Medicine, Durham, North Carolina, 27710, United States

\*To whom correspondence may be addressed:

Steven G. Rozen  
Department of Biostatistics and Bioinformatics, Duke University School of Medicine  
2424 Erwin Road, Suite 11092  
Hock Plaza Box 2721  
Durham, North Carolina, 27710, United States  
[steverozen@pm.me](mailto:steverozen@pm.me)

December 29, 2024

Code for these figures is at

[https://github.com/Rozen-Lab/sig\\_attribution\\_paper\\_code/](https://github.com/Rozen-Lab/sig_attribution_paper_code/)

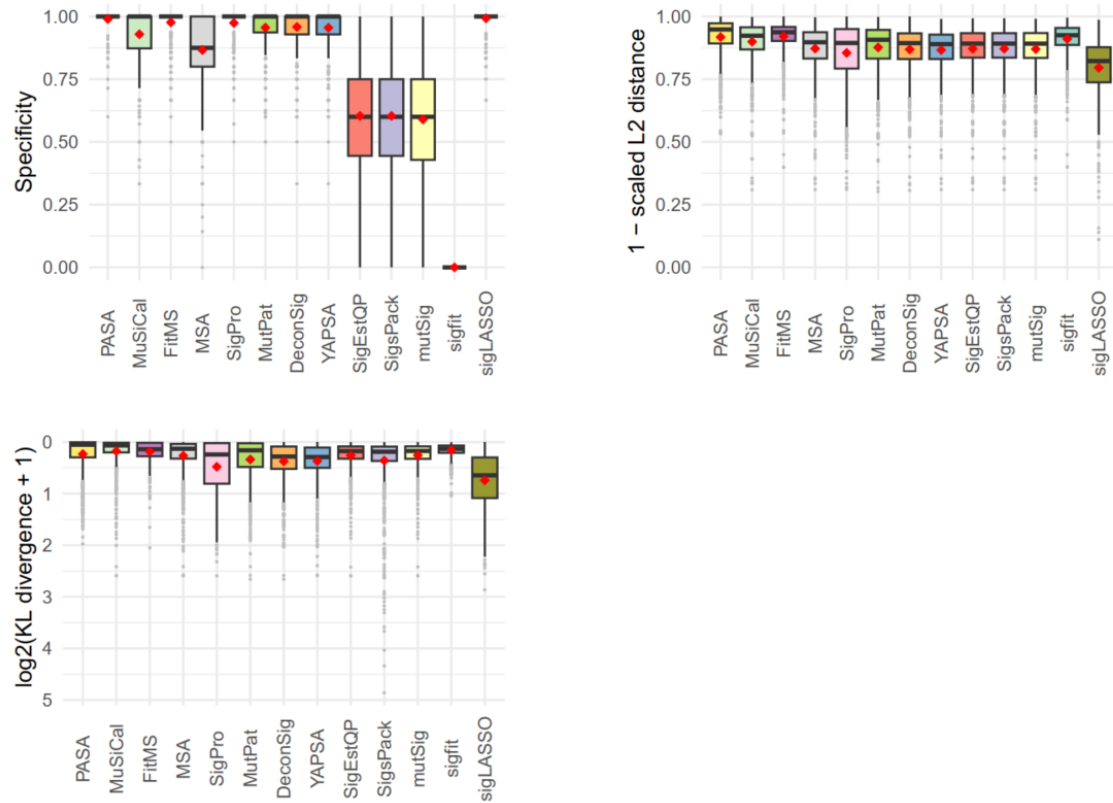

**Figure S1.** Accuracy of mutational signature attribution approaches over all synthetic SBS spectra. Scaled L2 distance is the Euclidean distance between the estimated and ground truth attribution divided by the total mutation count. KL divergence is the Kullback–Leibler divergence between the estimated and ground truth attribution. Dark horizontal lines indicate medians, red diamonds indicate means. The attribution approaches are ordered by descending mean of the Combined score for all cancer types from highest to lowest. See main Figure 3 for more details. Abbreviations for attribution approaches are listed in Table 1.

**Figure S2 (the next 7 pages).** Accuracy of mutational signature attribution approaches on synthetic SBS data analyzed for each cancer type. **(A)** Combined Score, the sum of (1 – scaled Manhattan distance), precision and recall. **(B)** Scaled Manhattan distance is the Manhattan distance between the spectrum and the reconstructed spectrum divided by the total mutation count. **(C)** Precision. **(D)** Recall (sensitivity). **(E)** Specificity. **(F)** Scaled L2 distance, the Euclidean distance between the estimated and ground truth attribution divided by the total mutation count. **(G)** KL divergence, the Kullback–Leibler divergence between the estimated and ground truth attribution. Dark horizontal lines indicate medians, red diamonds indicate means. The attribution approaches are ordered by descending mean of the Combined score for all cancer types from highest to lowest (main text Figure 3). Abbreviations for attribution approaches are listed in Table 1. Abbreviations of cancer types are as in Alexandrov et al., 2020, doi: 10.1038/s41586-020-1943-3.

Supplementary Figure S2A, Combined Score by cancer type for SBS

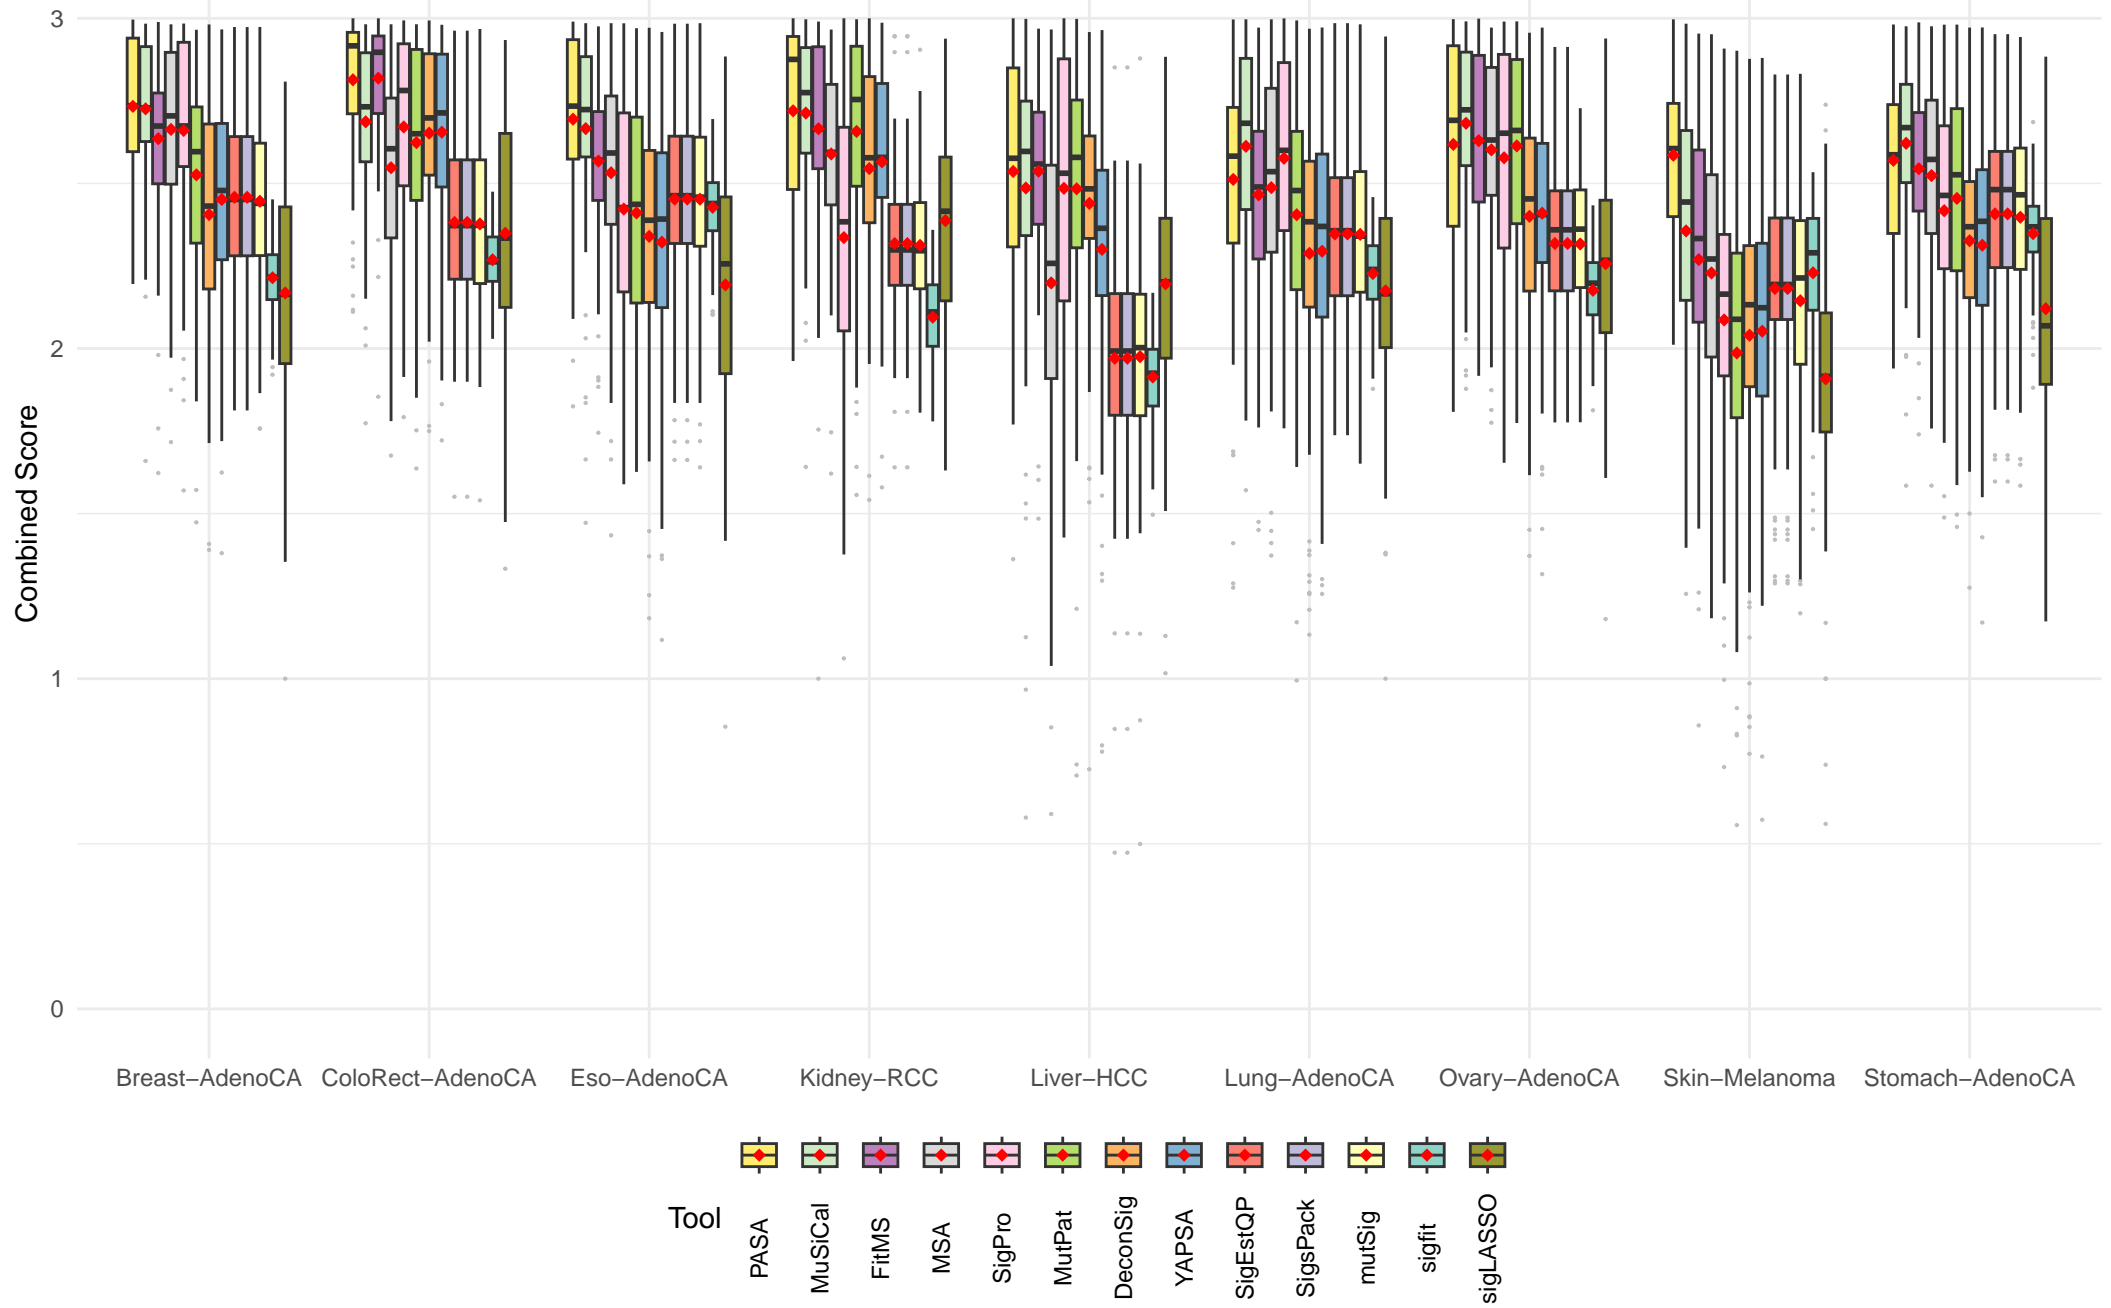

Supplementary Figure S2B, 1 – scaled Manhattan distance by cancer type for SBS

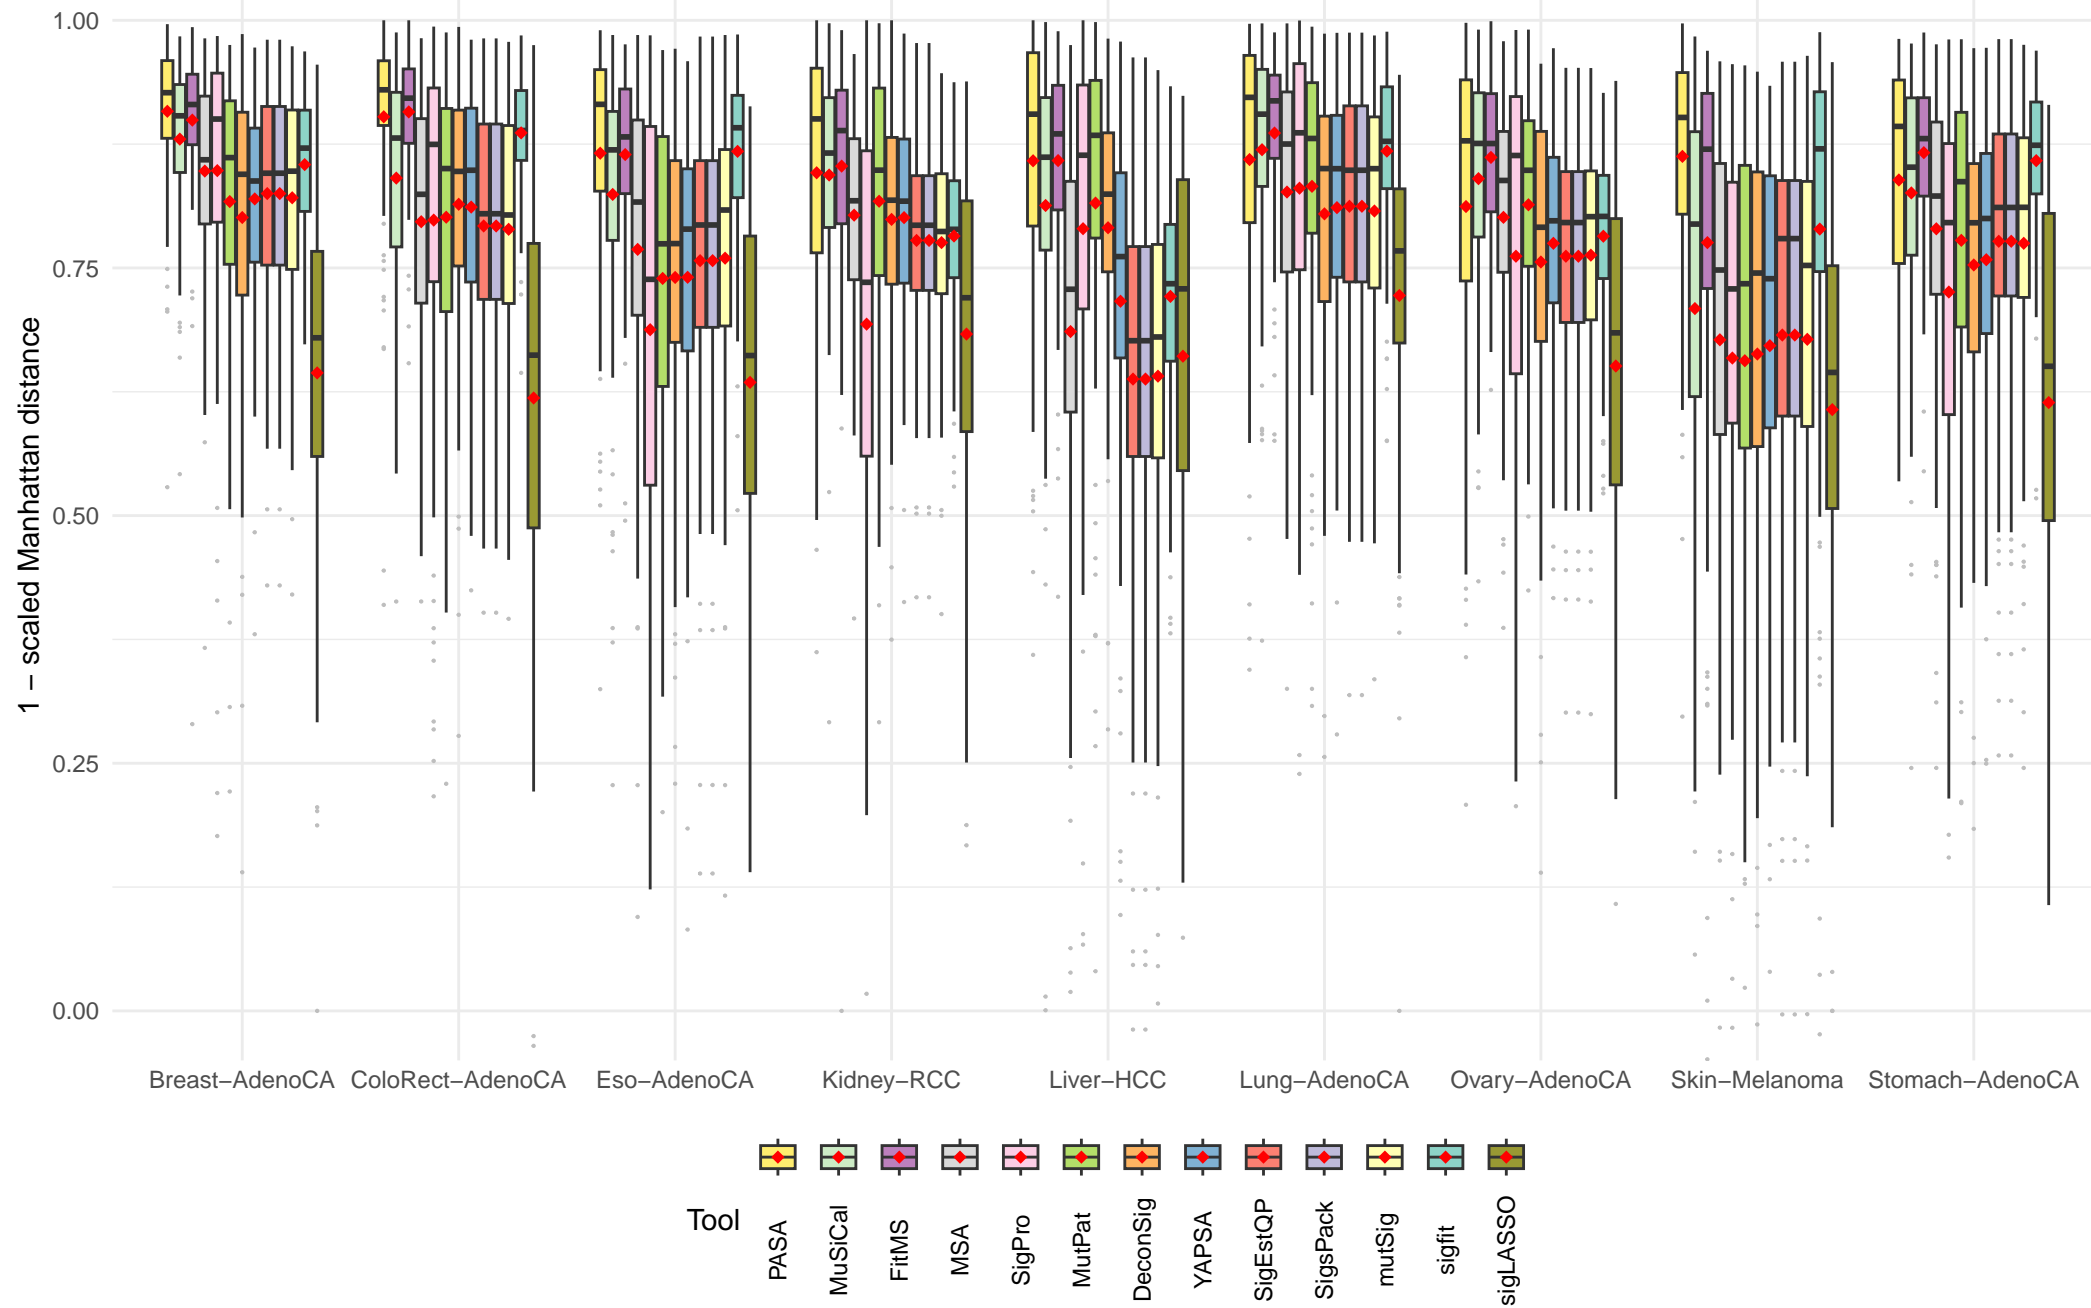

Supplementary Figure S2C, Precision by cancer type for SBS

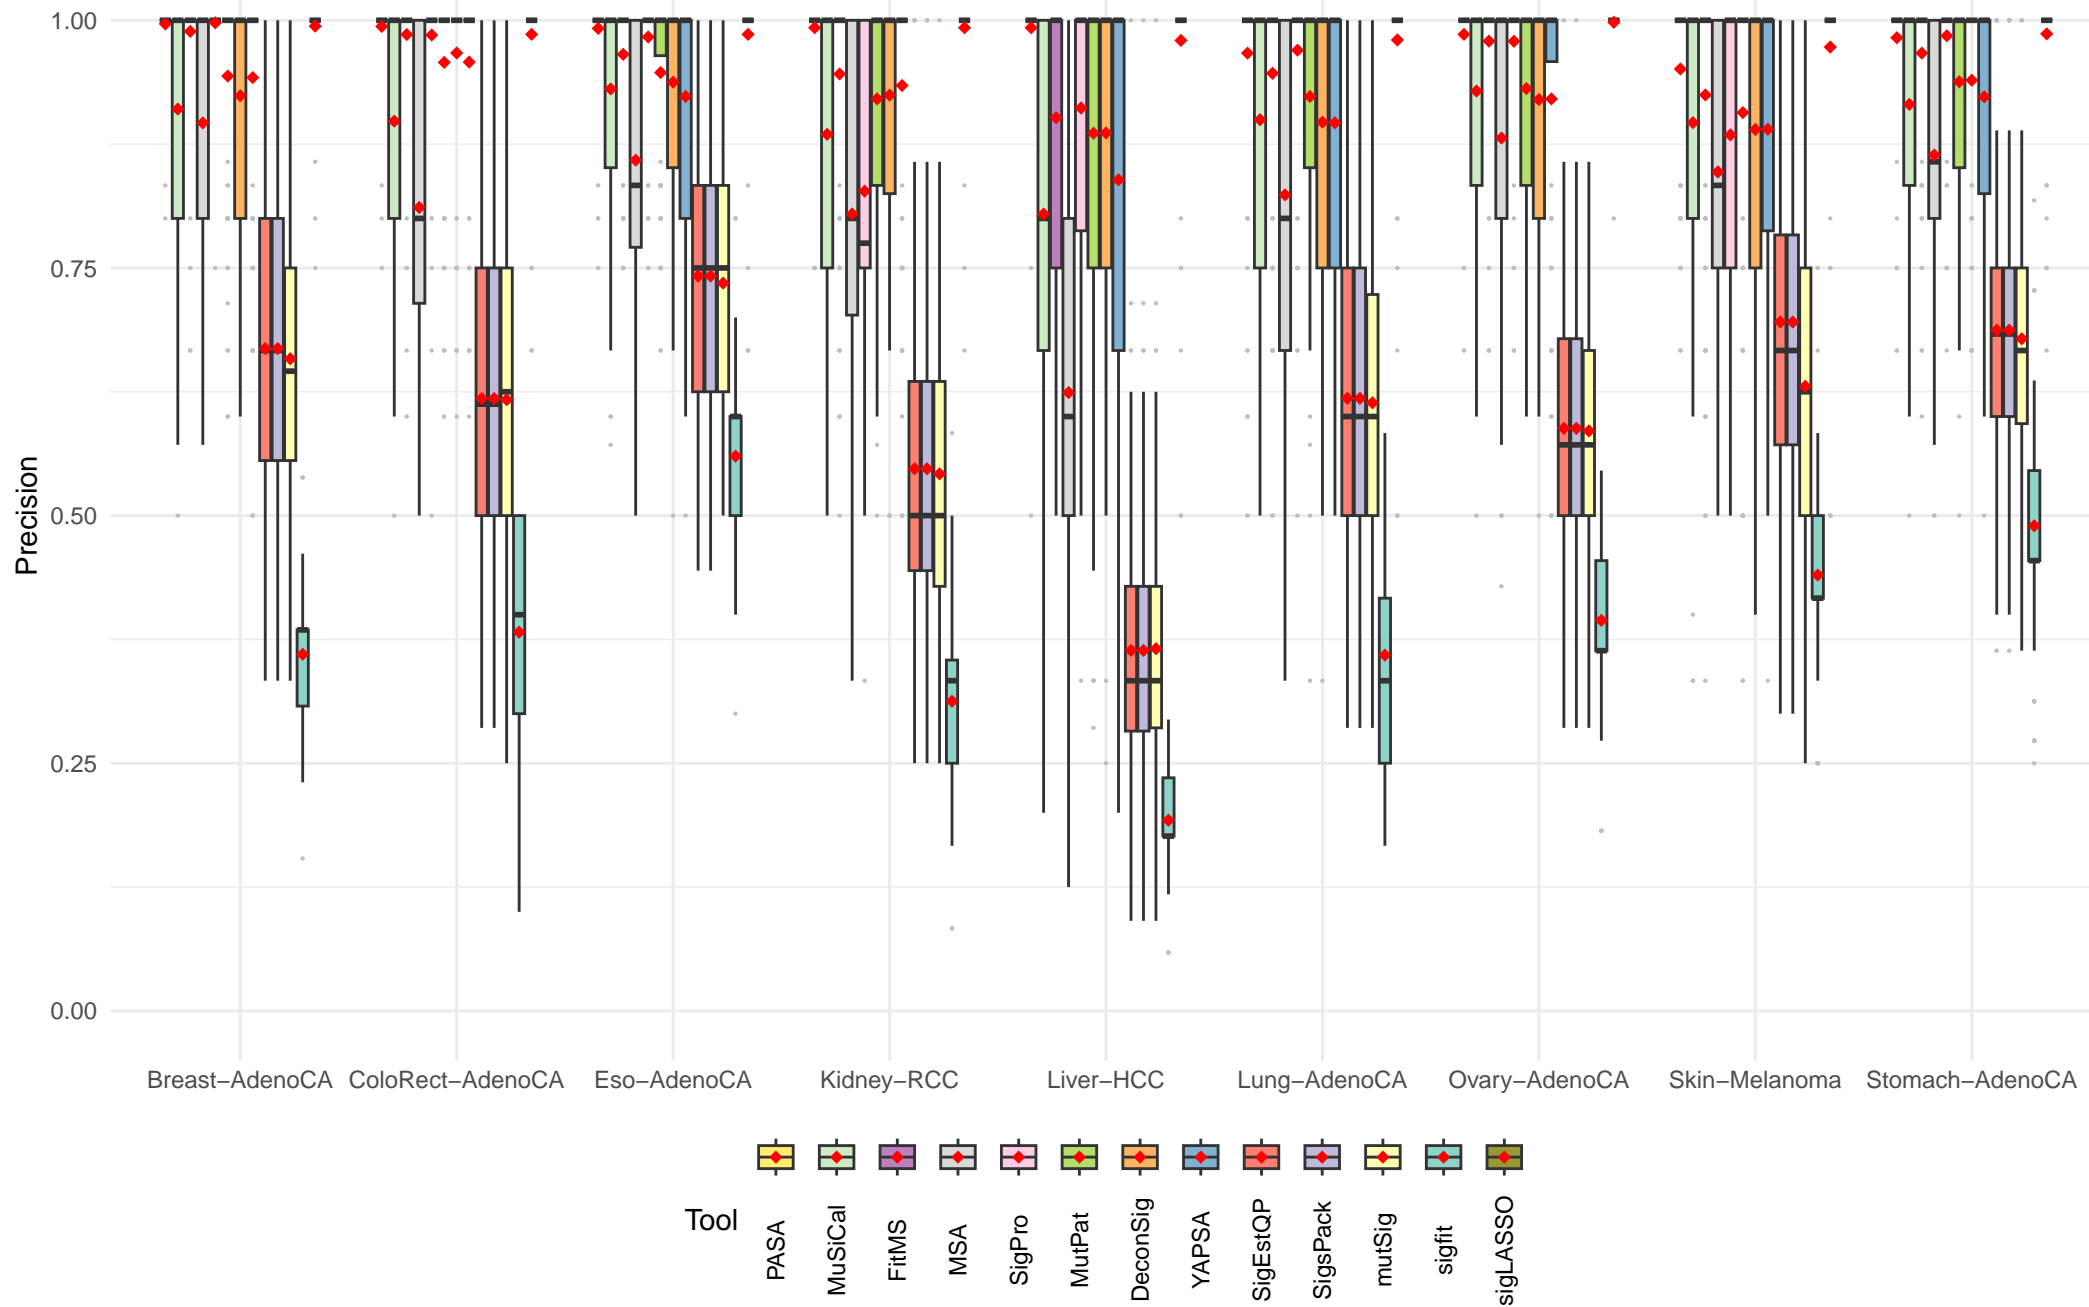

Supplementary Figure S2D, Recall (Sensitivity) by cancer type for SBS

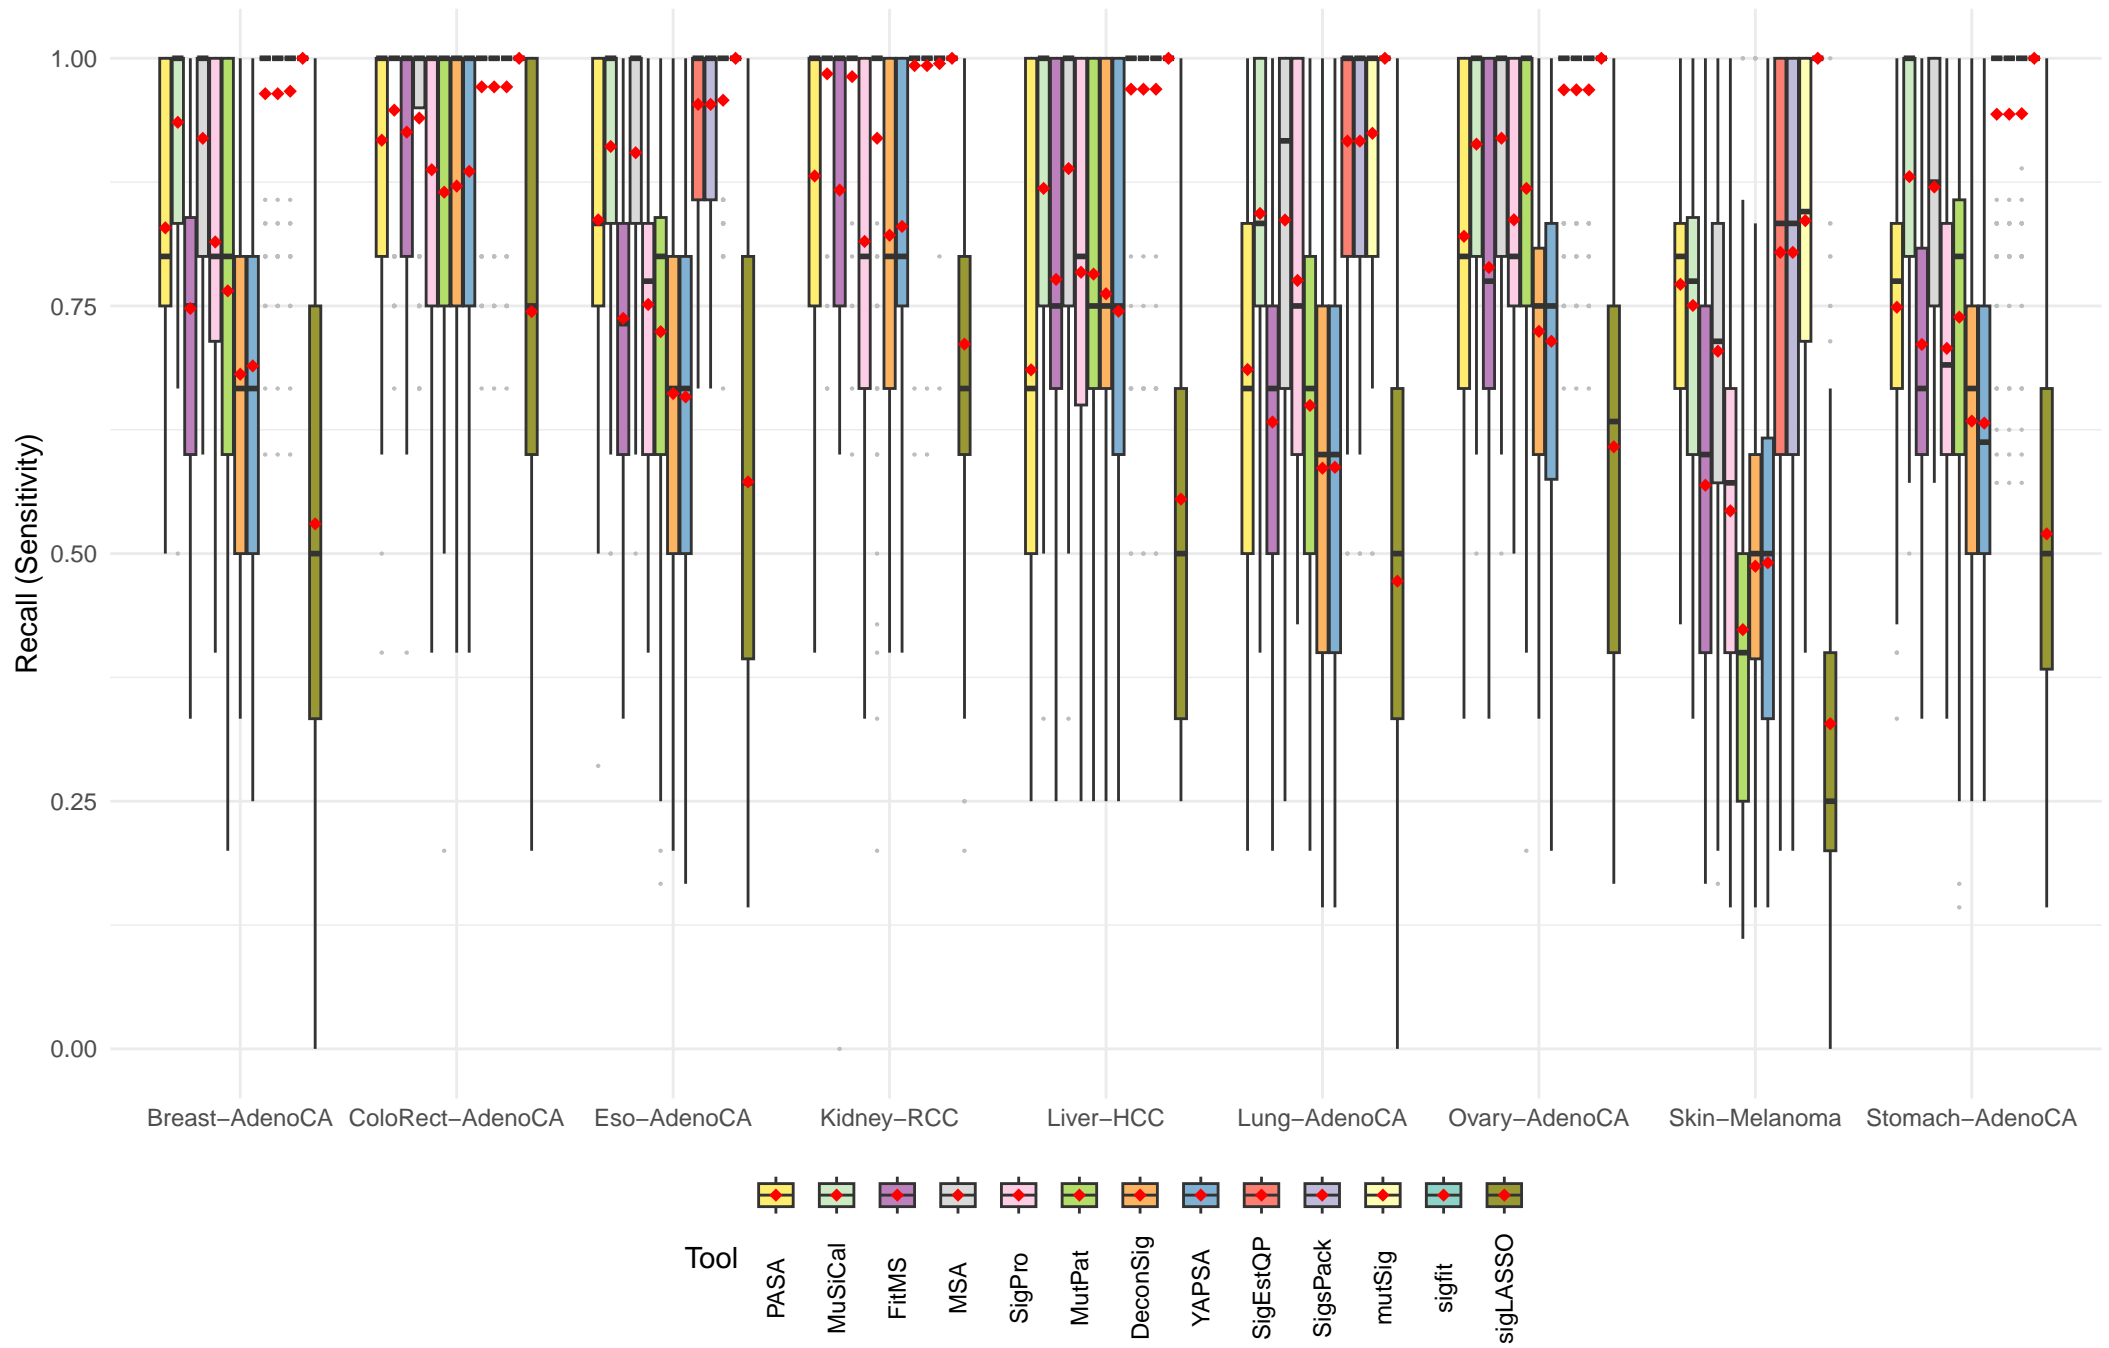

Supplementary Figure S2E, Specificity by cancer type for SBS

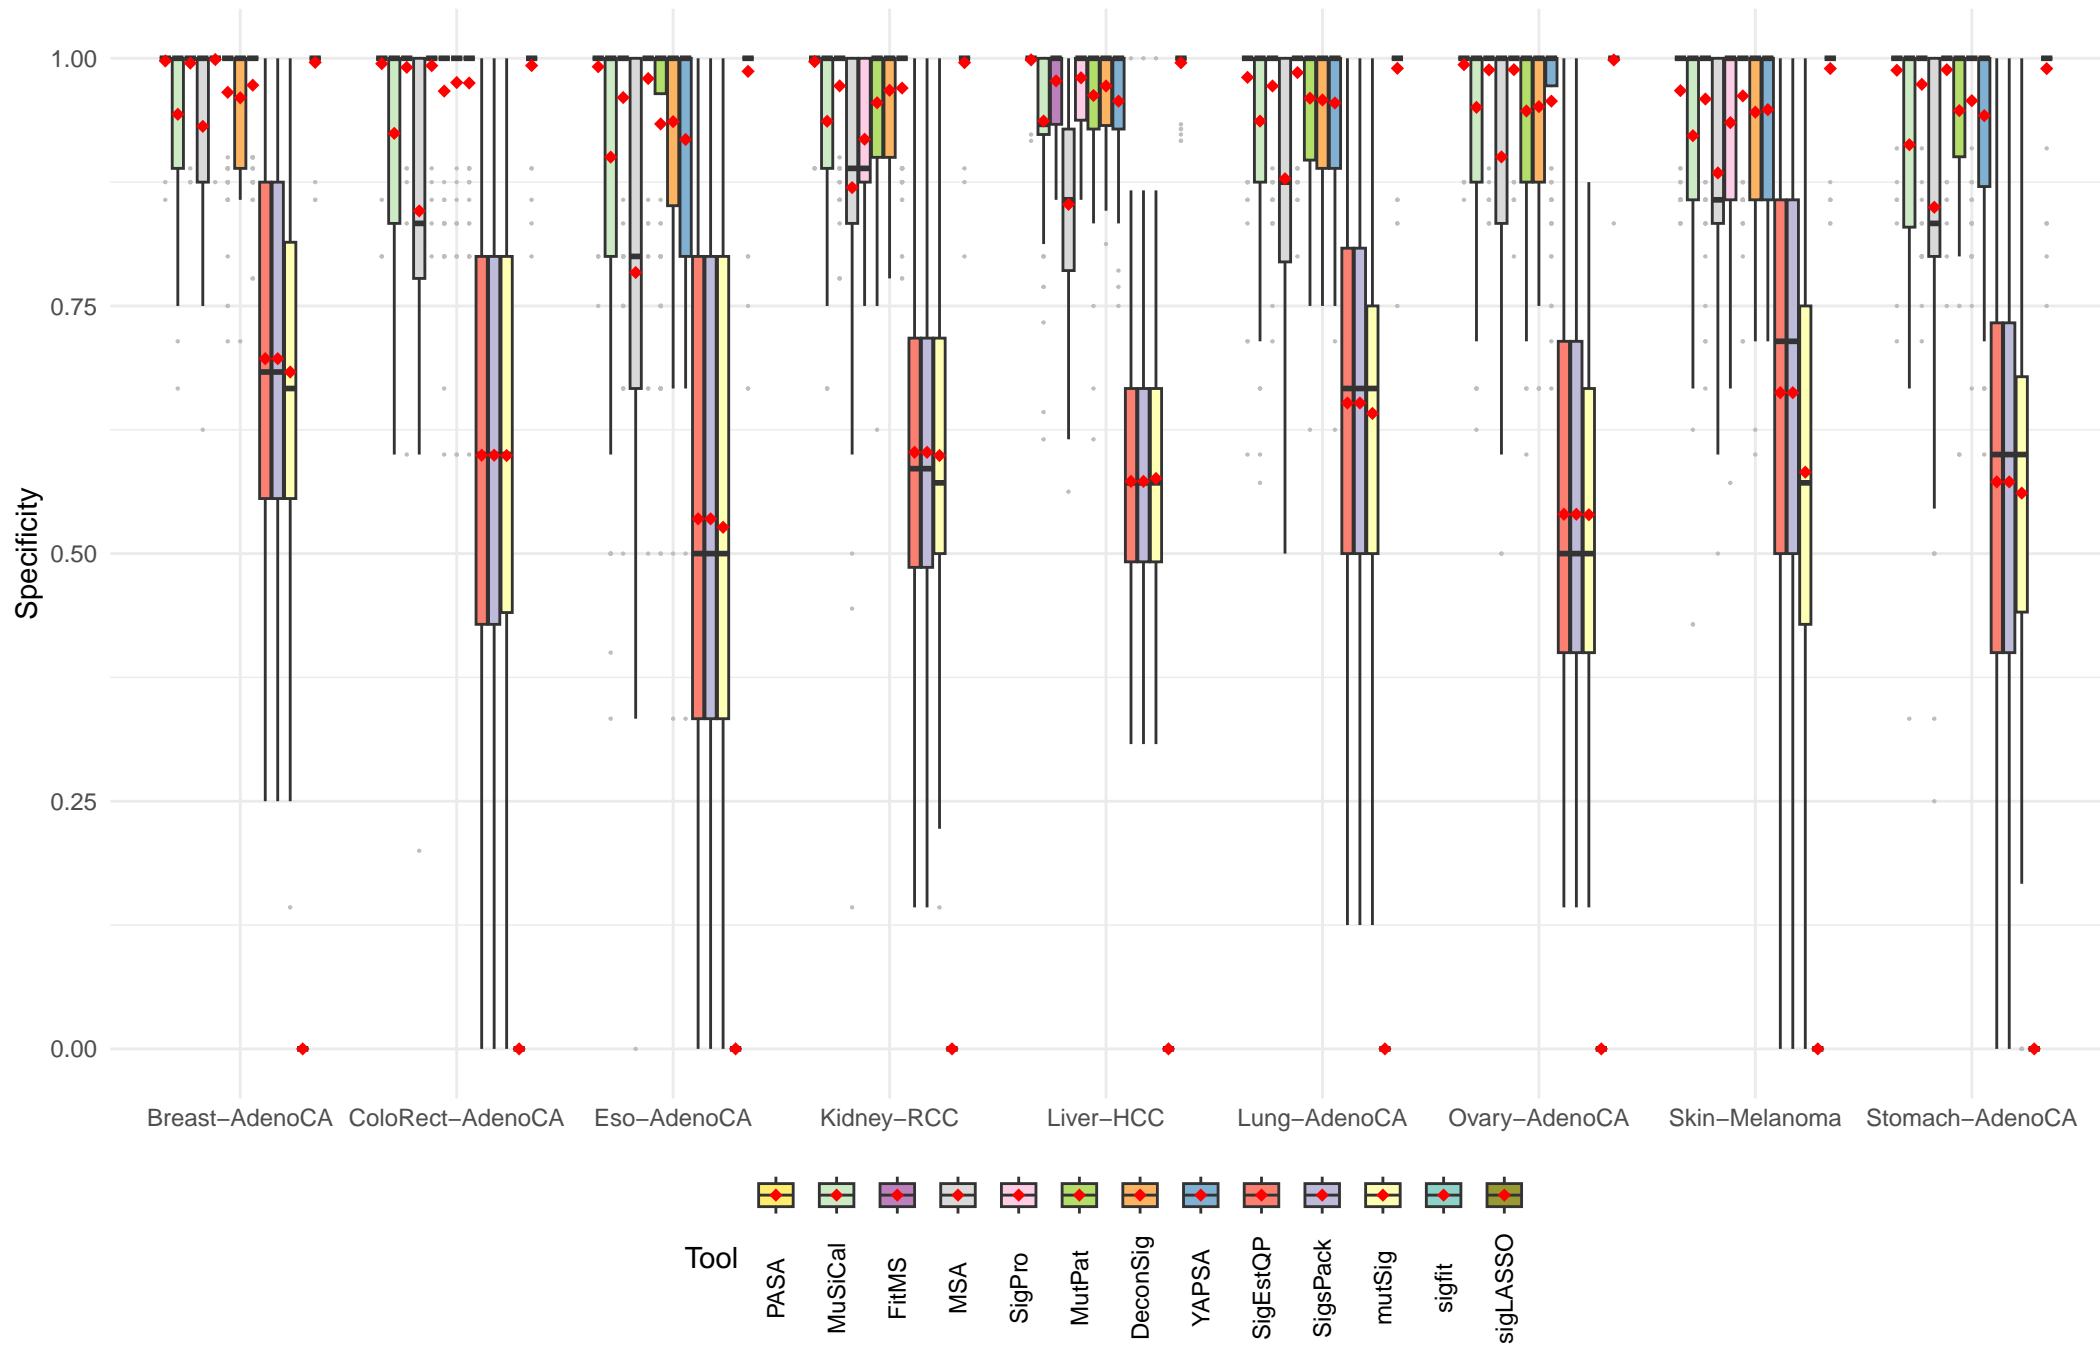



Supplementary Figure S2F, 1 – scaled L2 distance by cancer type for SBS

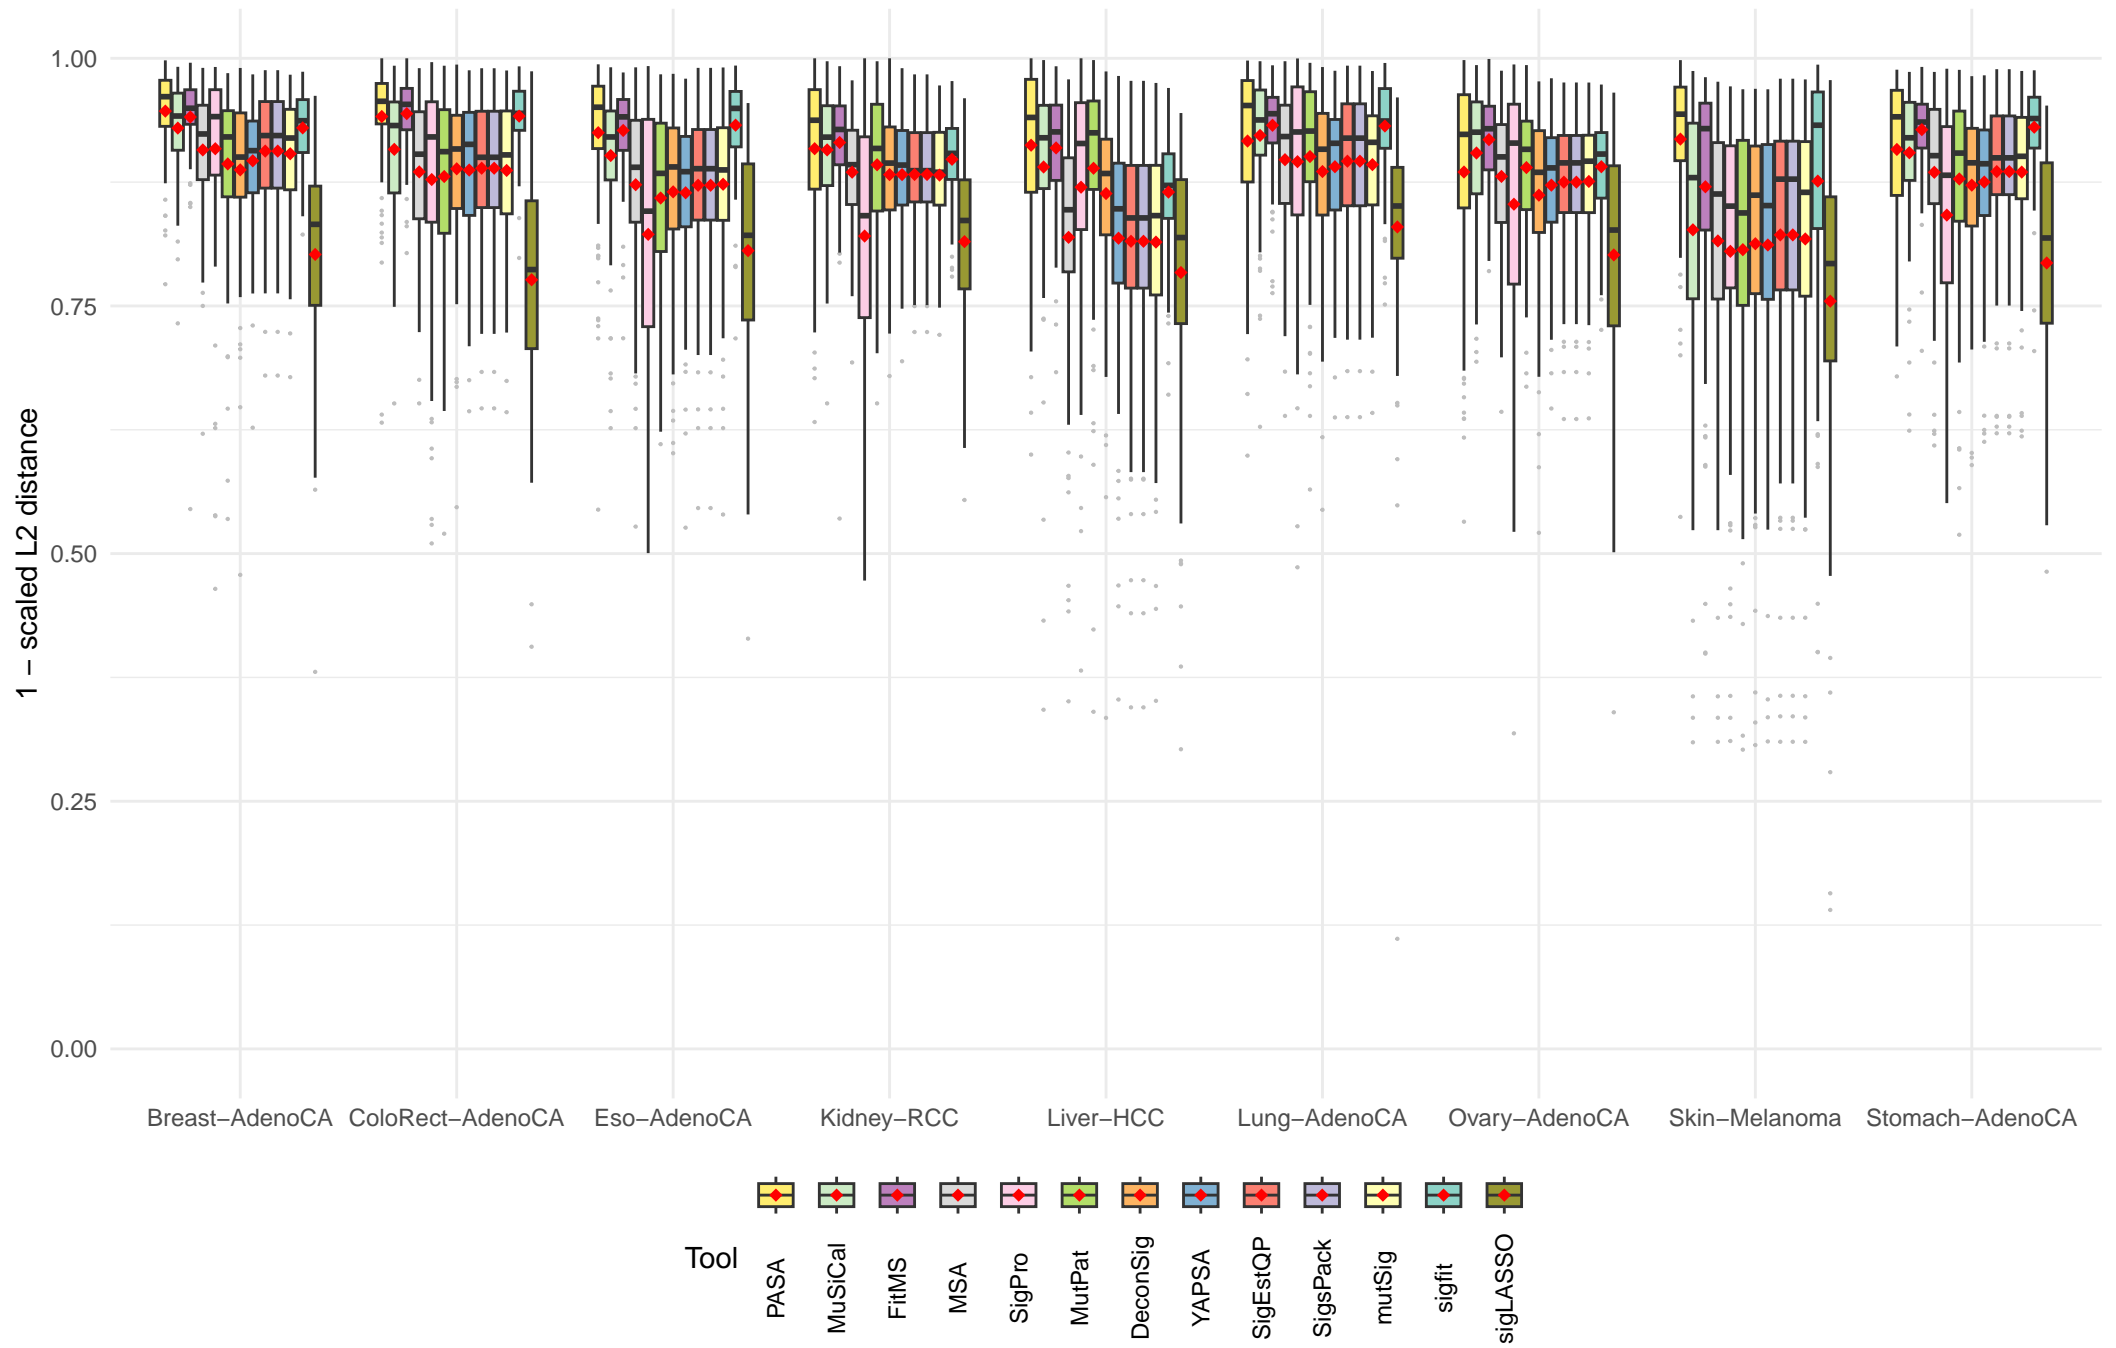

Supplementary Figure S2G,  $\log_2(\text{KL divergence} + 1)$  by cancer type for SBS

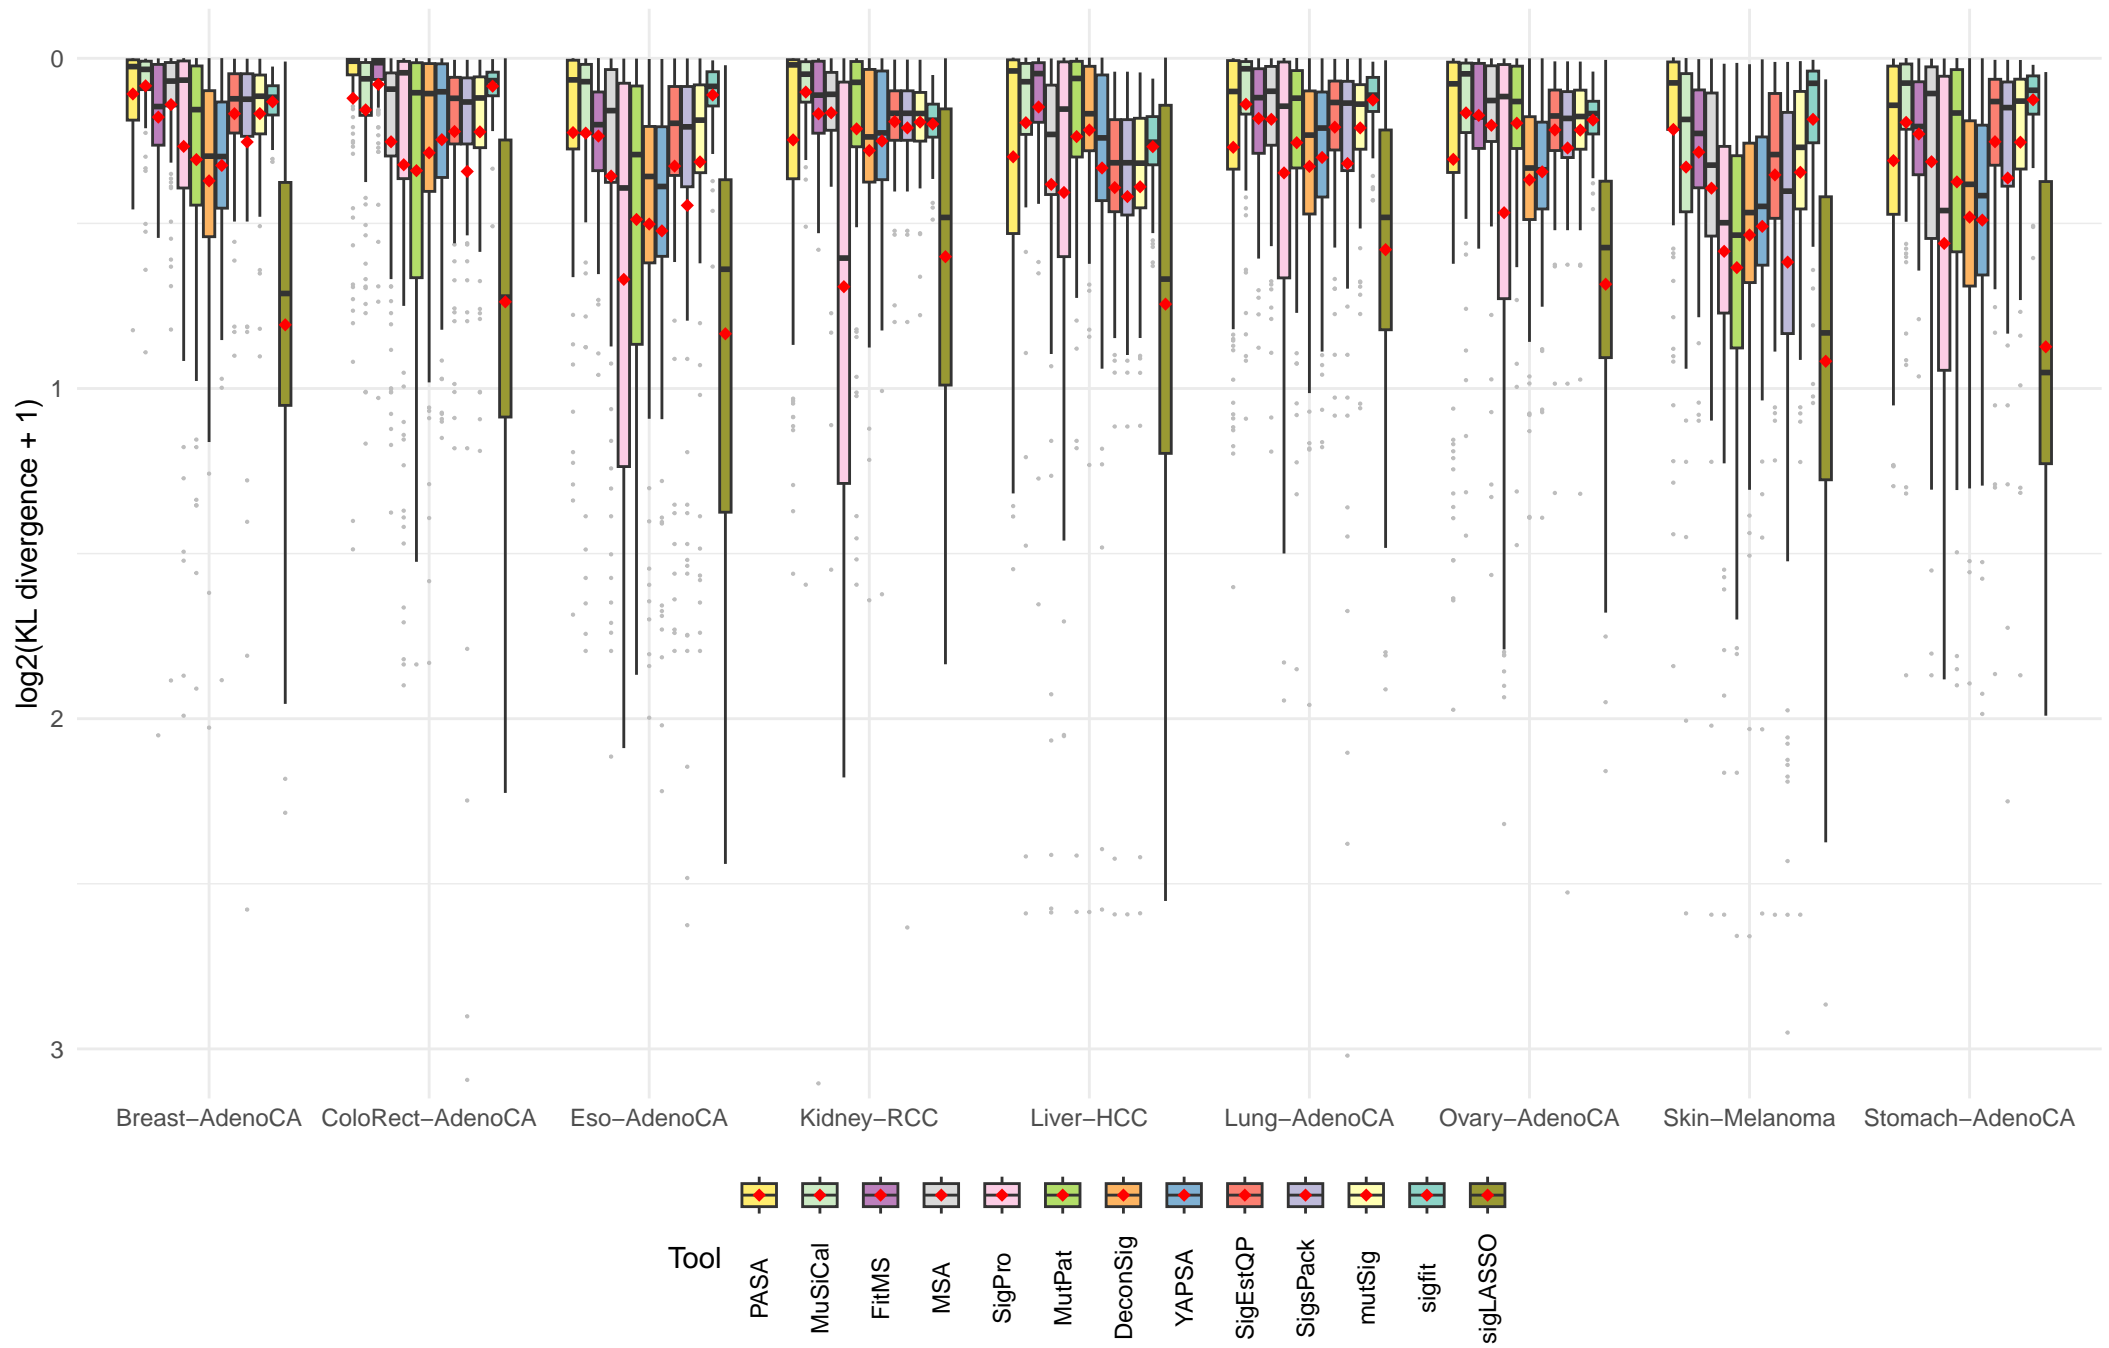

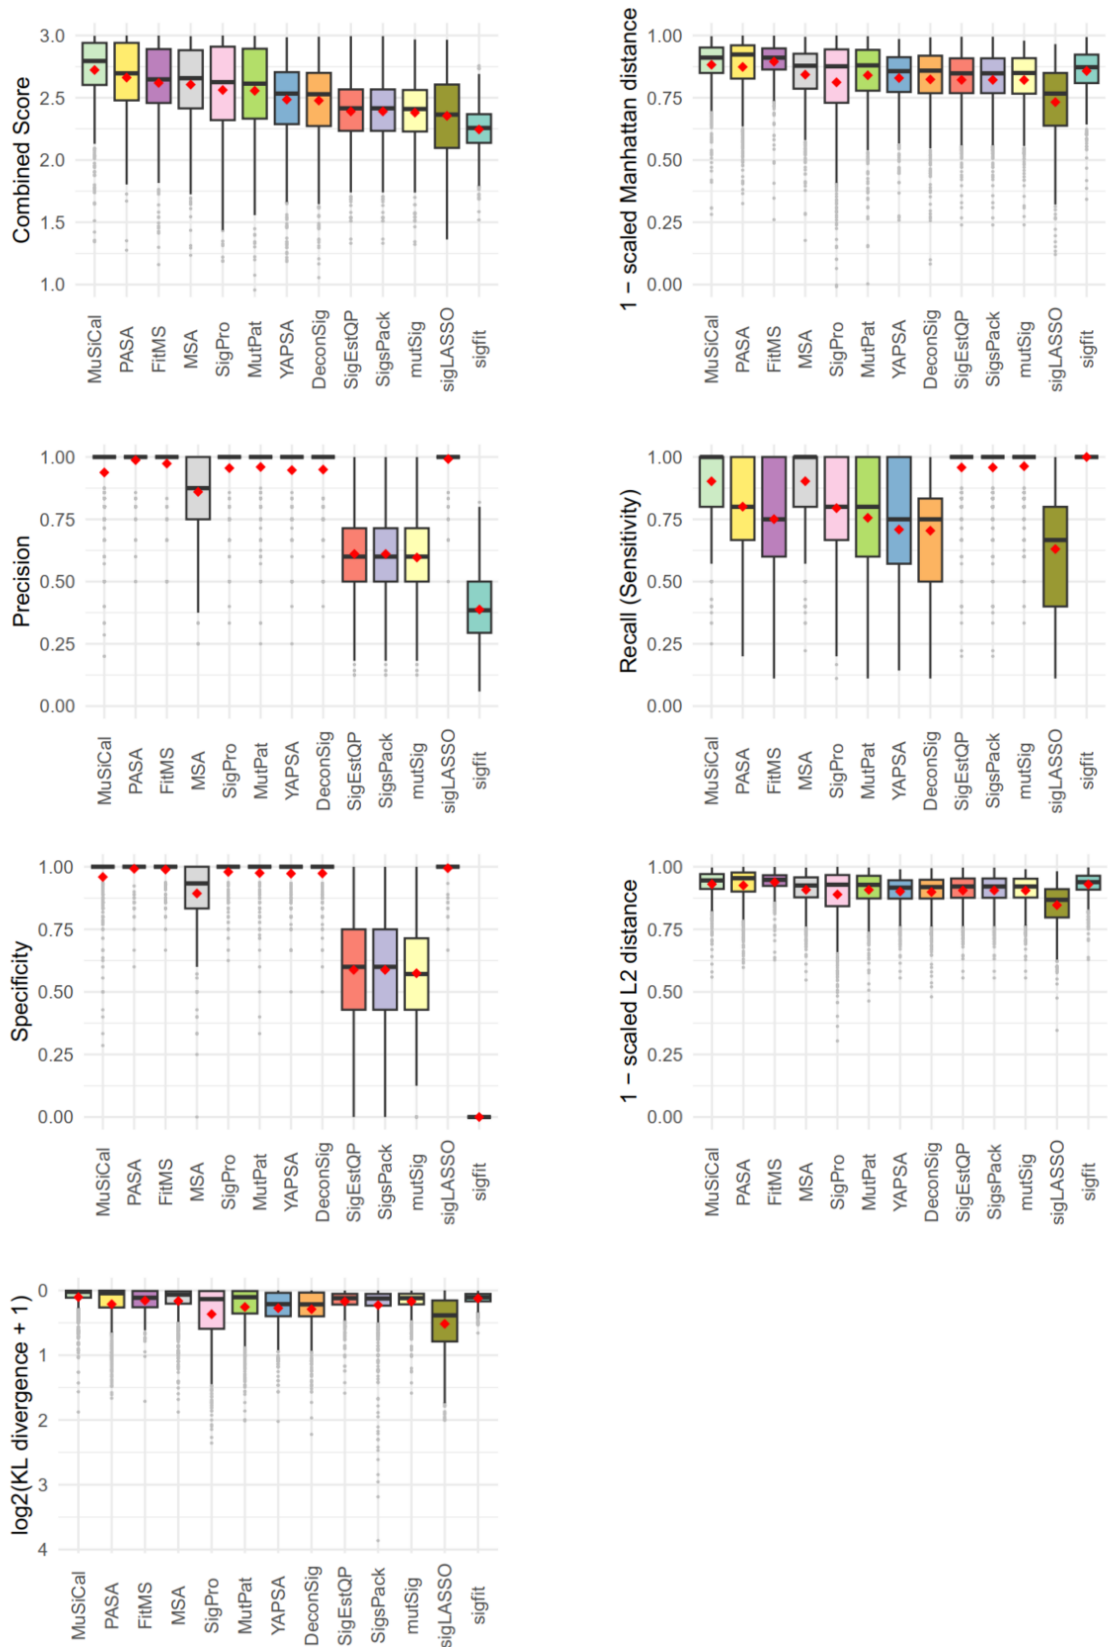

**Figure S3.** Analogous to main text Figure 3 and supplementary Figure S1 for synthetic data generated with underestimated sampling variance.

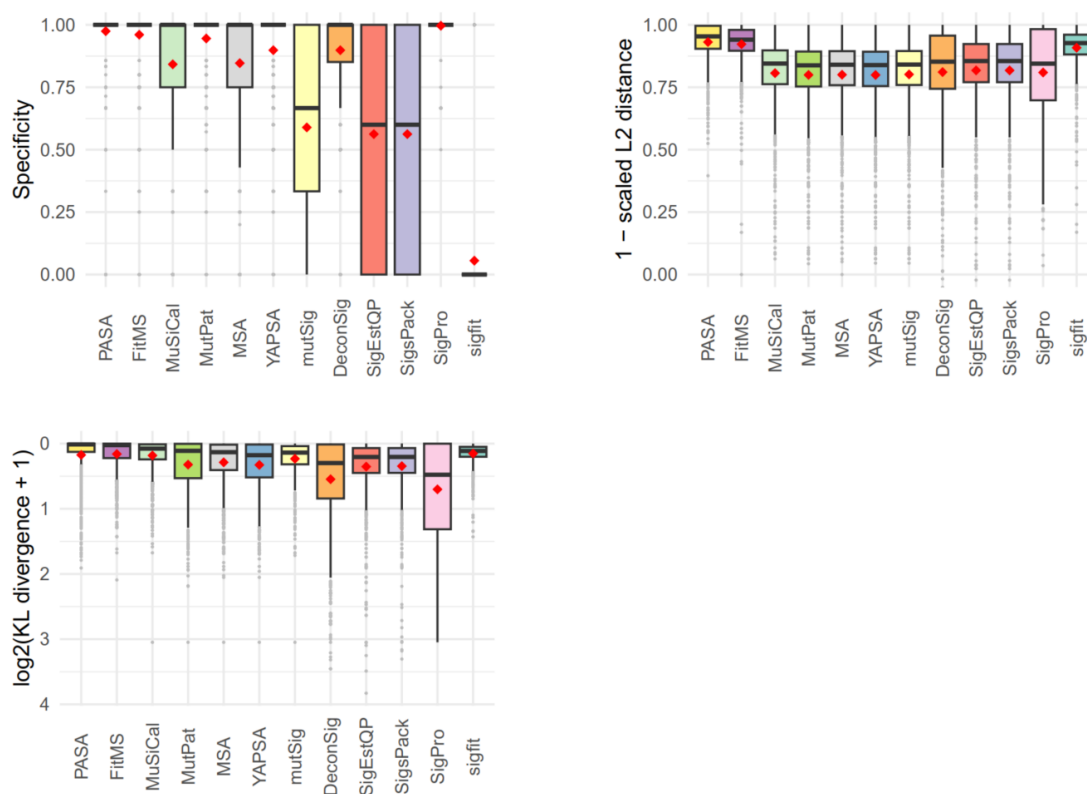

**Figure S4.** Accuracy of mutational signature attribution approaches over all synthetic DBS spectra. Scaled L2 distance is the Euclidean distance between the estimated and ground truth attribution divided by the total mutation count. KL divergence is the Kullback–Leibler divergence between the estimated and ground truth attribution. Dark horizontal lines indicate medians. Red diamonds indicate means. The attribution approaches are ordered by descending mean of the Combined score for all cancer types from highest to lowest. See main Figure 4 for more details. Abbreviations for attribution approaches are listed in Table 1.

**Figure S5 (the next 7 pages).** Accuracy of mutational signature attribution approaches on synthetic DBS data analyzed for each cancer type. **(A)** Combined Score, the sum of (1 – scaled Manhattan distance), precision and recall. **(B)** Scaled Manhattan distance is the Manhattan distance between the spectrum and the reconstructed spectrum divided by the total mutation count. **(C)** Precision. **(D)** Recall (sensitivity). **(E)** Specificity. **(F)** Scaled L2 distance, the Euclidean distance between the estimated and ground truth attribution divided by the total mutation count. **(G)** KL divergence, the Kullback–Leibler divergence between the estimated and ground truth attribution. Dark horizontal lines indicate medians. Red diamonds indicate means. The attribution approaches are ordered by descending mean of the Combined score for all cancer types from highest to lowest (main text Figure 4). Abbreviations for attribution approaches are listed in Table 1. Abbreviations of cancer types are as in Alexandrov et al., 2020, doi: 10.1038/s41586-020-1943-3.

Supplementary Figure S5A, Combined Score by cancer type for DBS

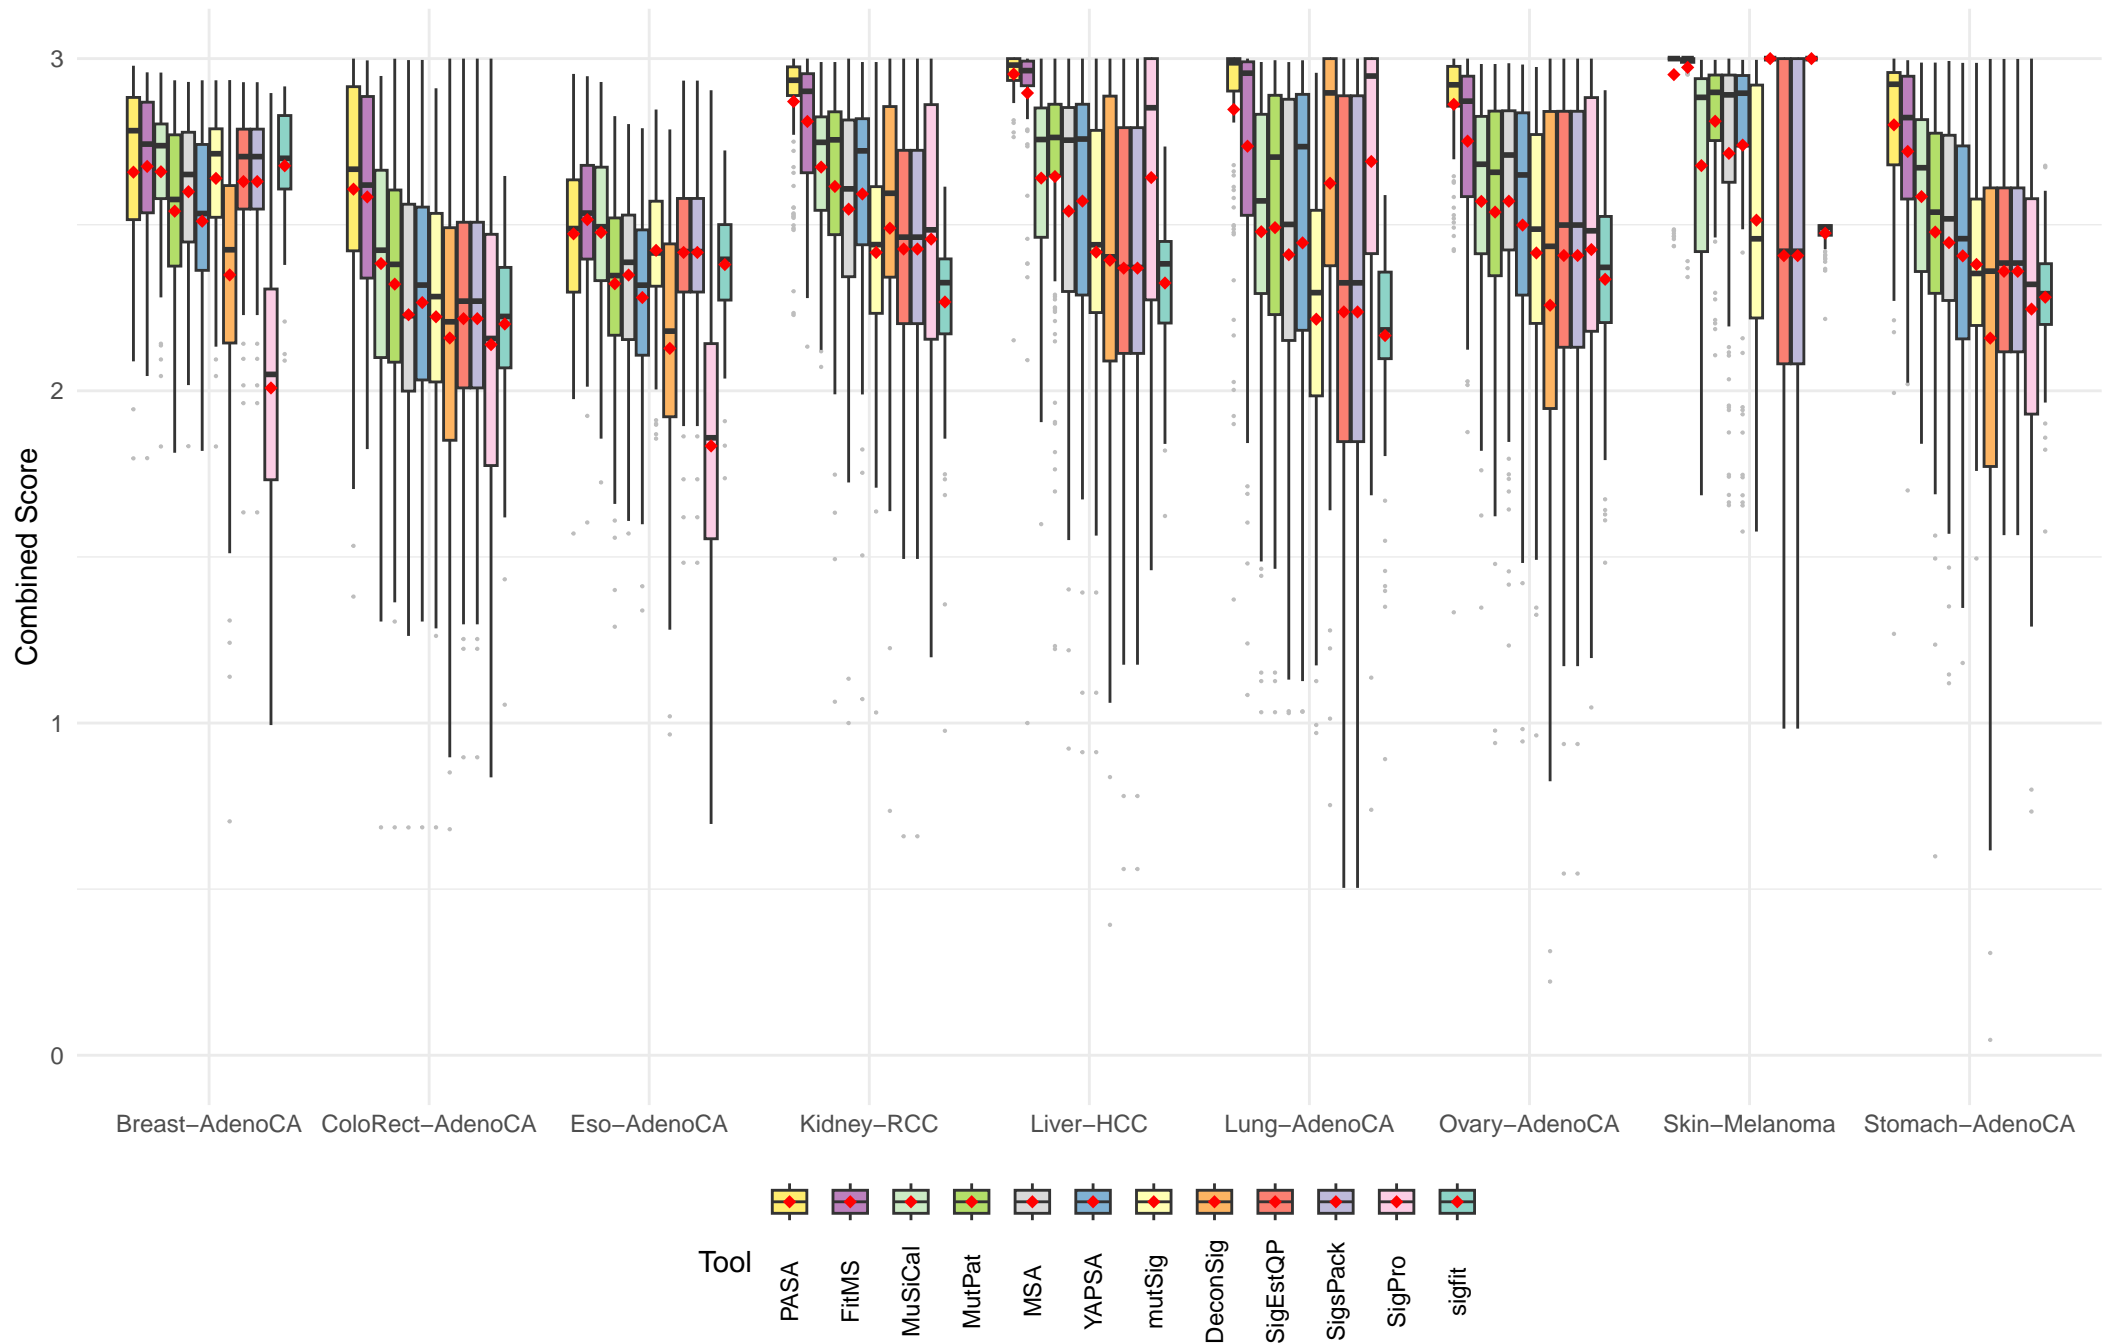

Supplementary Figure S5B, 1 – scaled Manhattan distance by cancer type for DBS

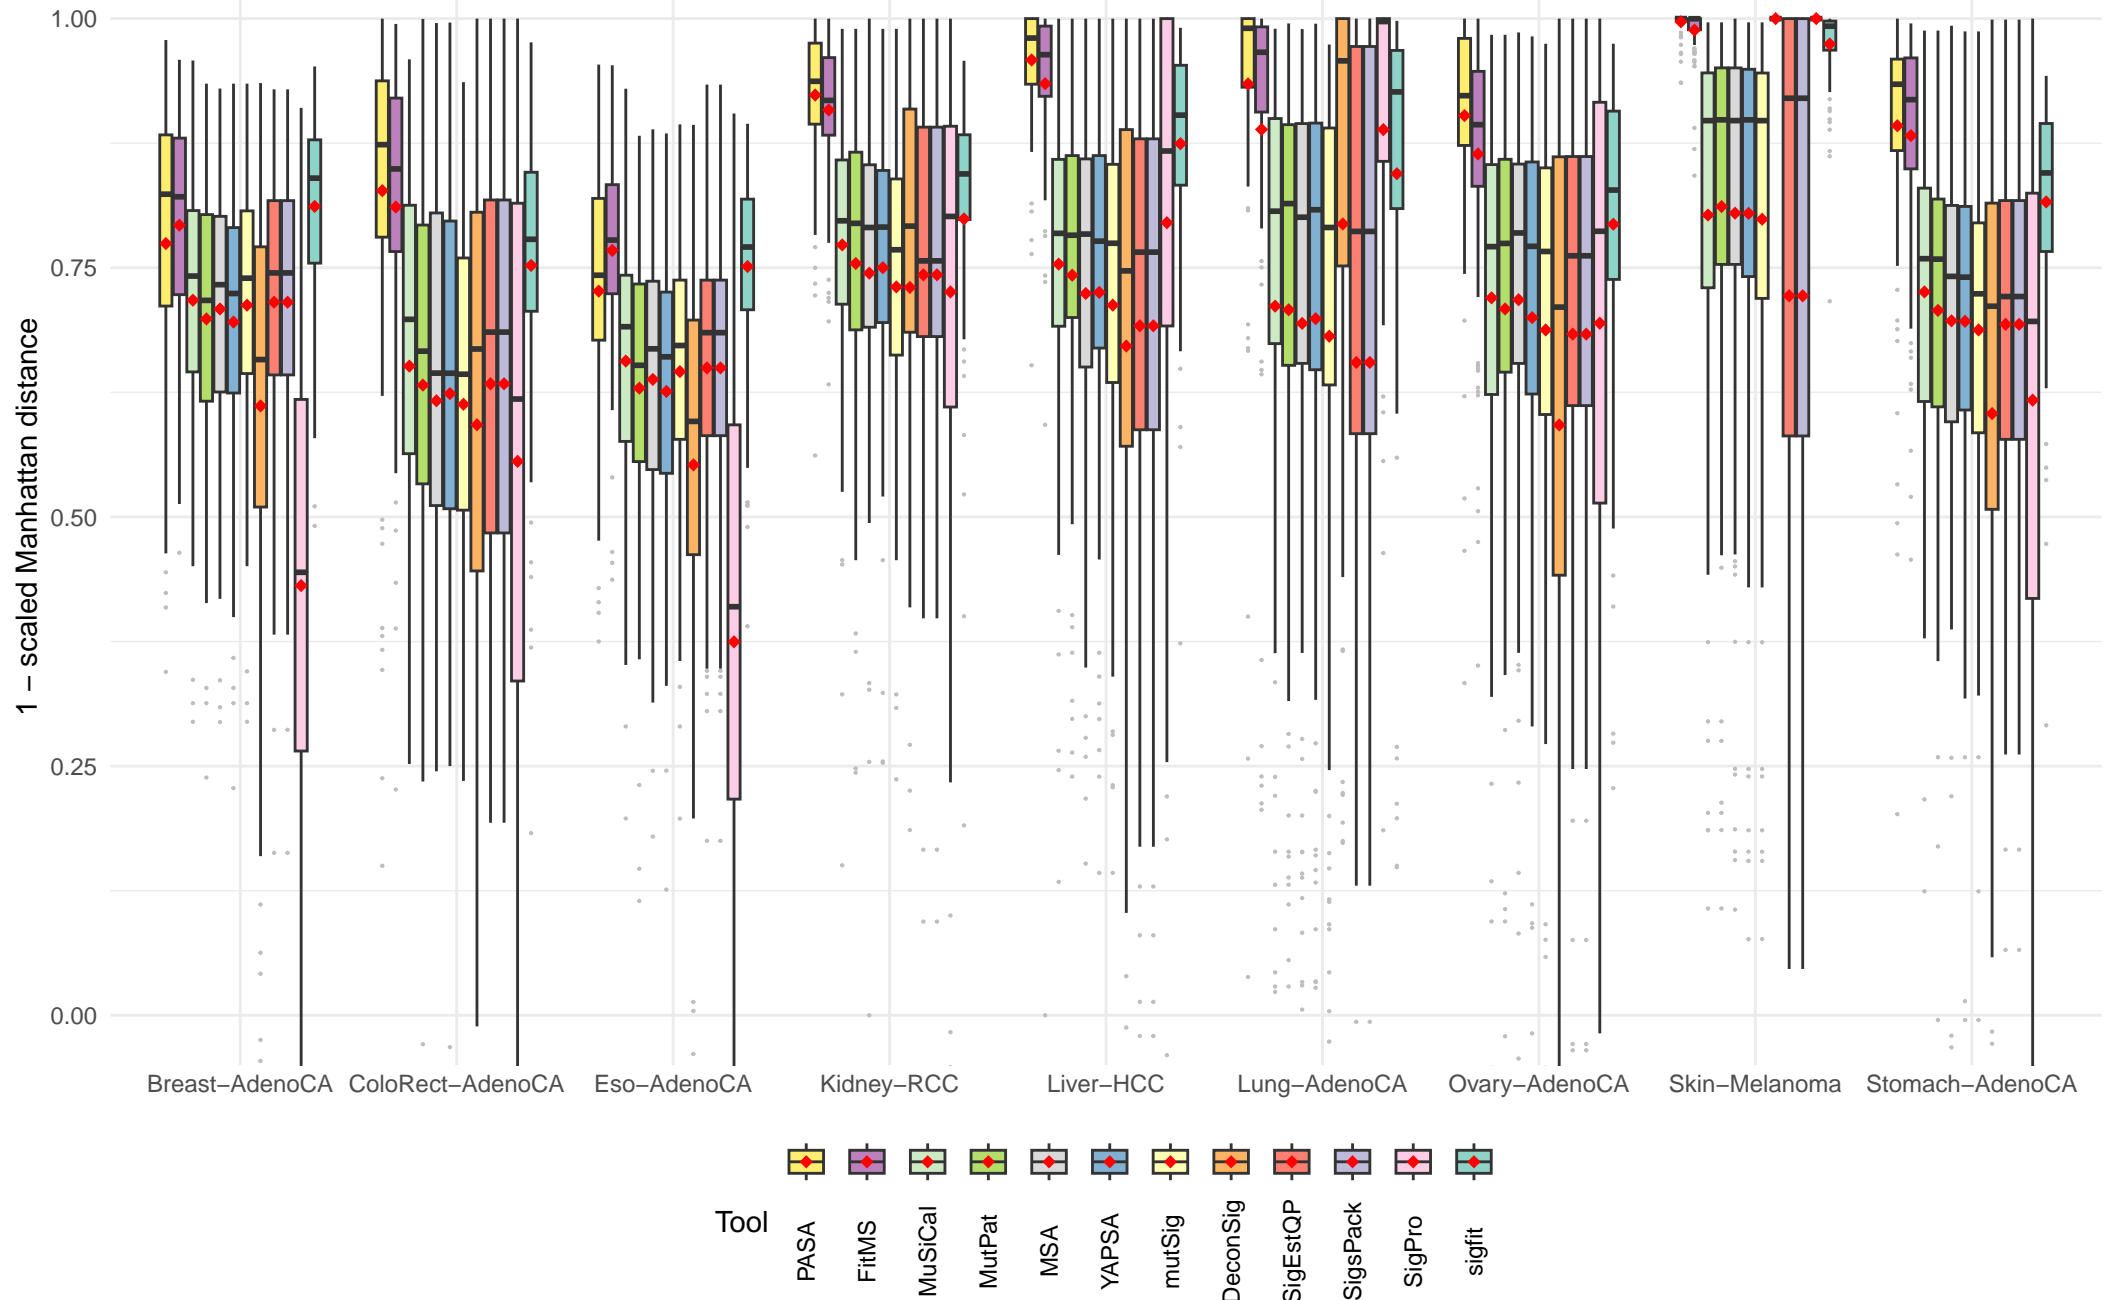

Supplementary Figure S5C, Precision by cancer type for DBS

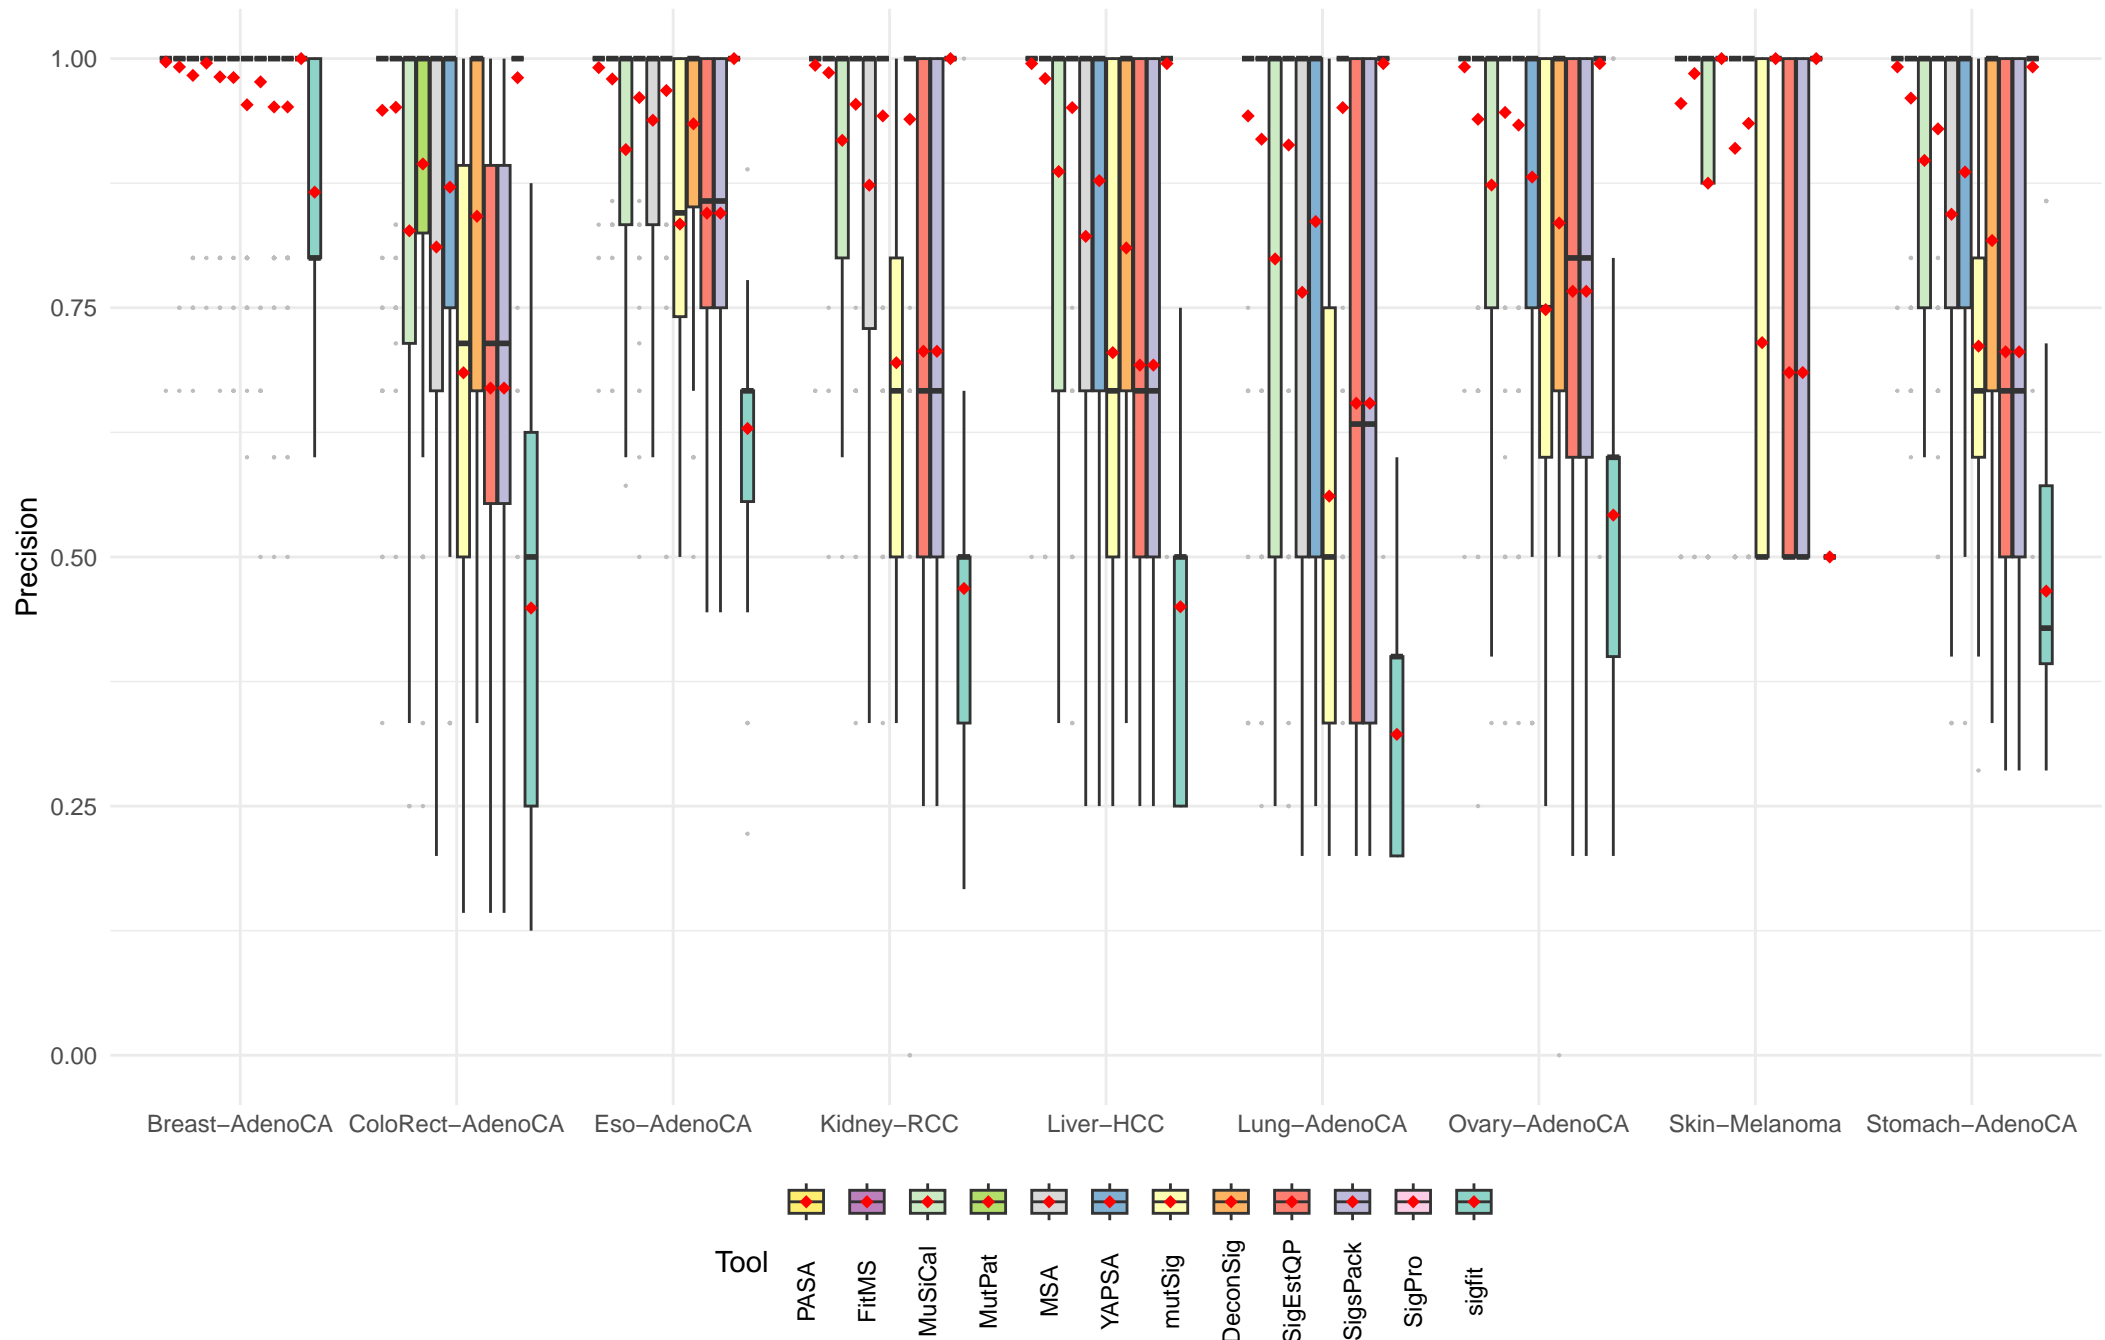



Supplementary Figure S5D, Recall (Sensitivity) by cancer type for DBS

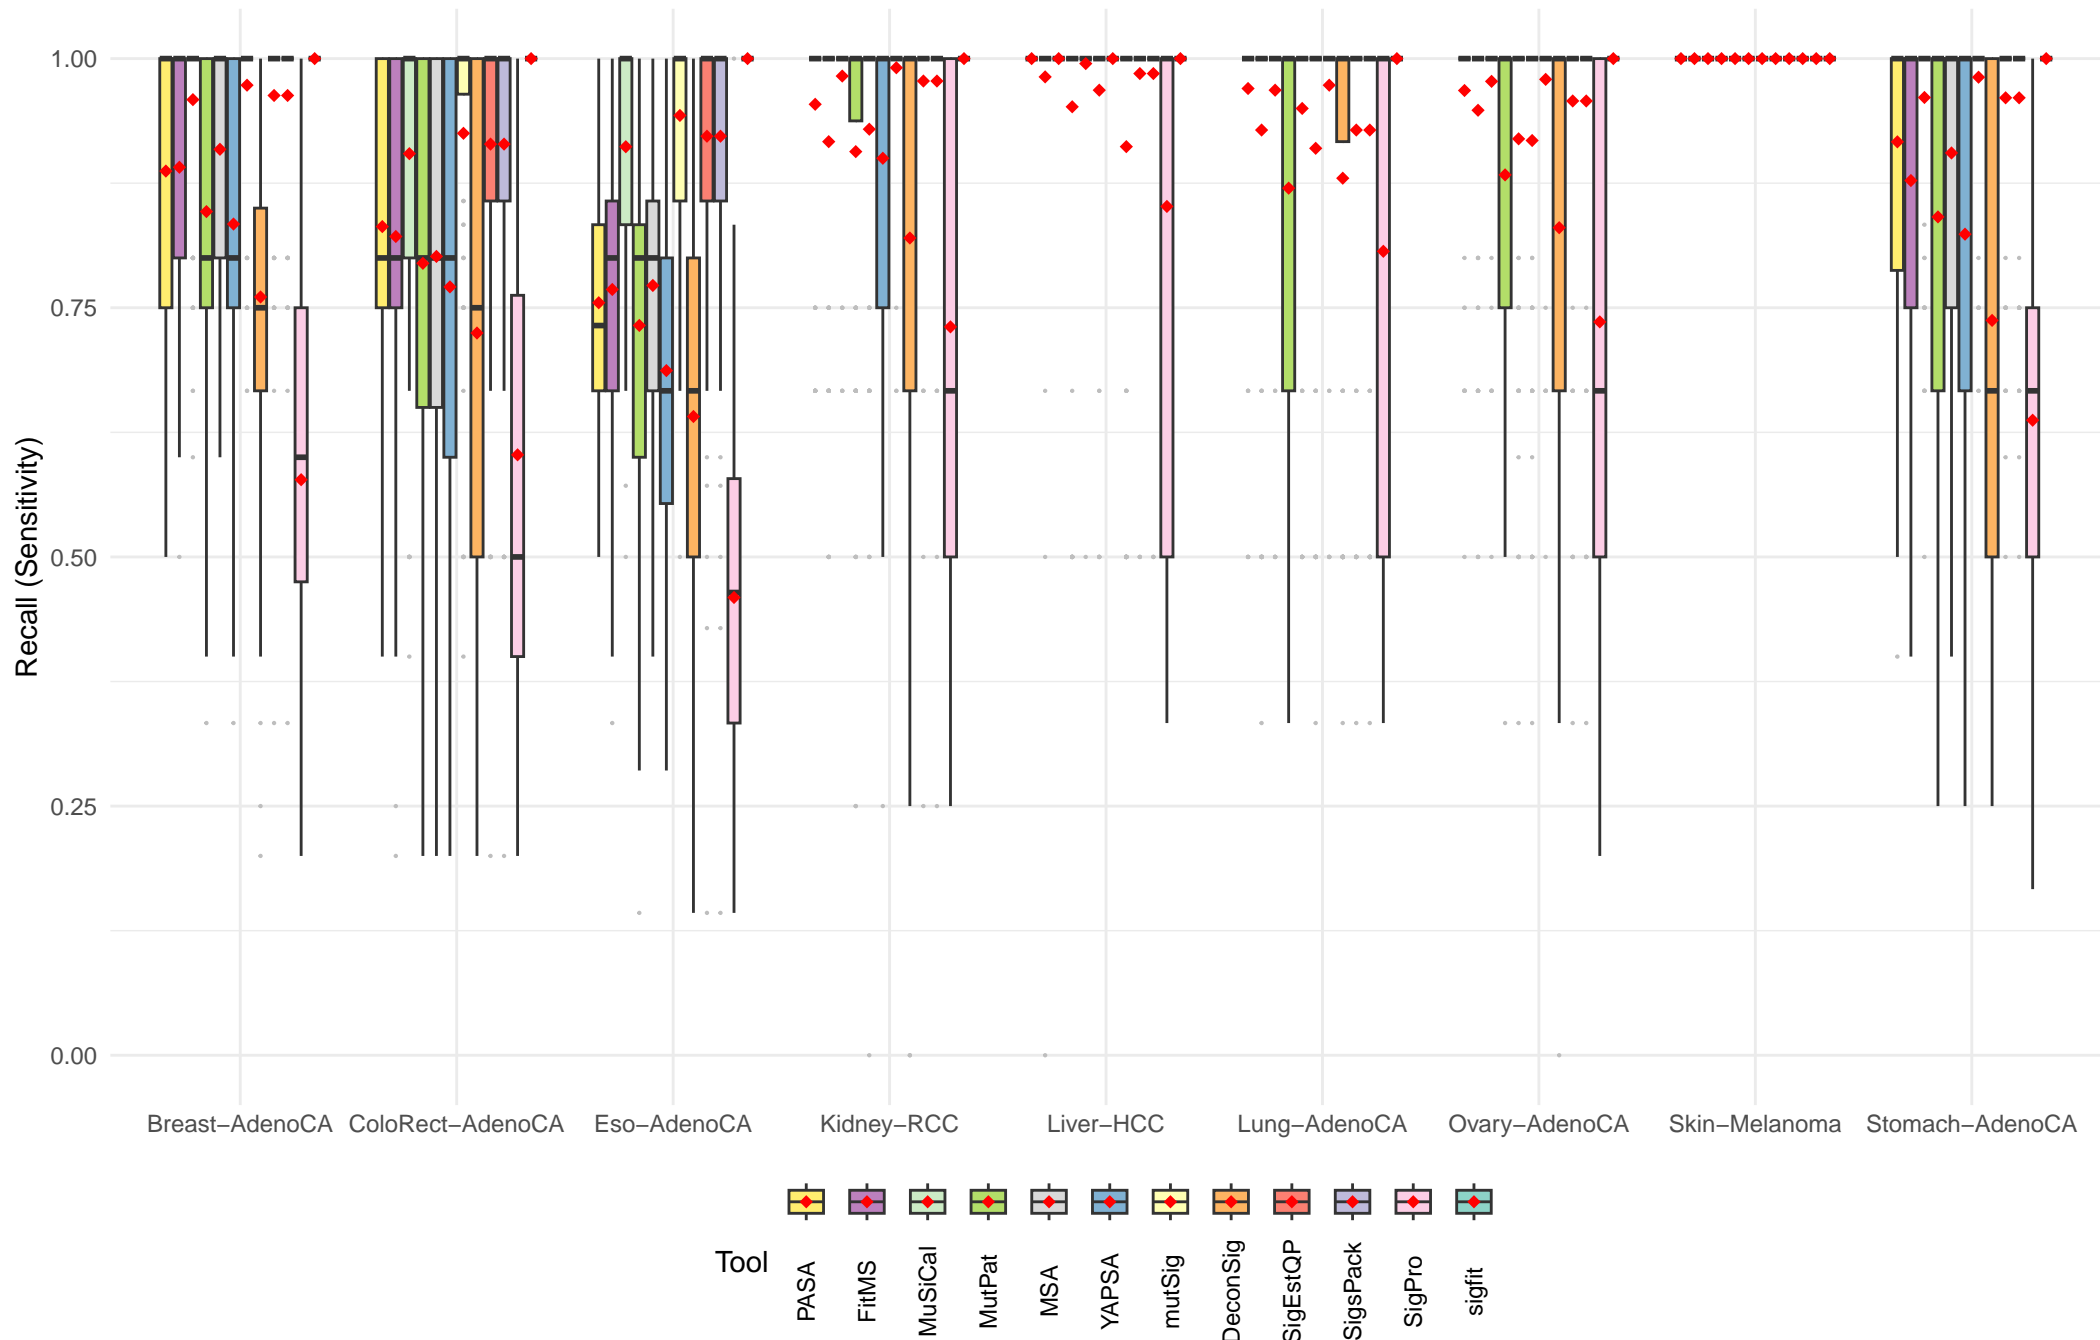

Supplementary Figure S5E, Specificity by cancer type for DBS

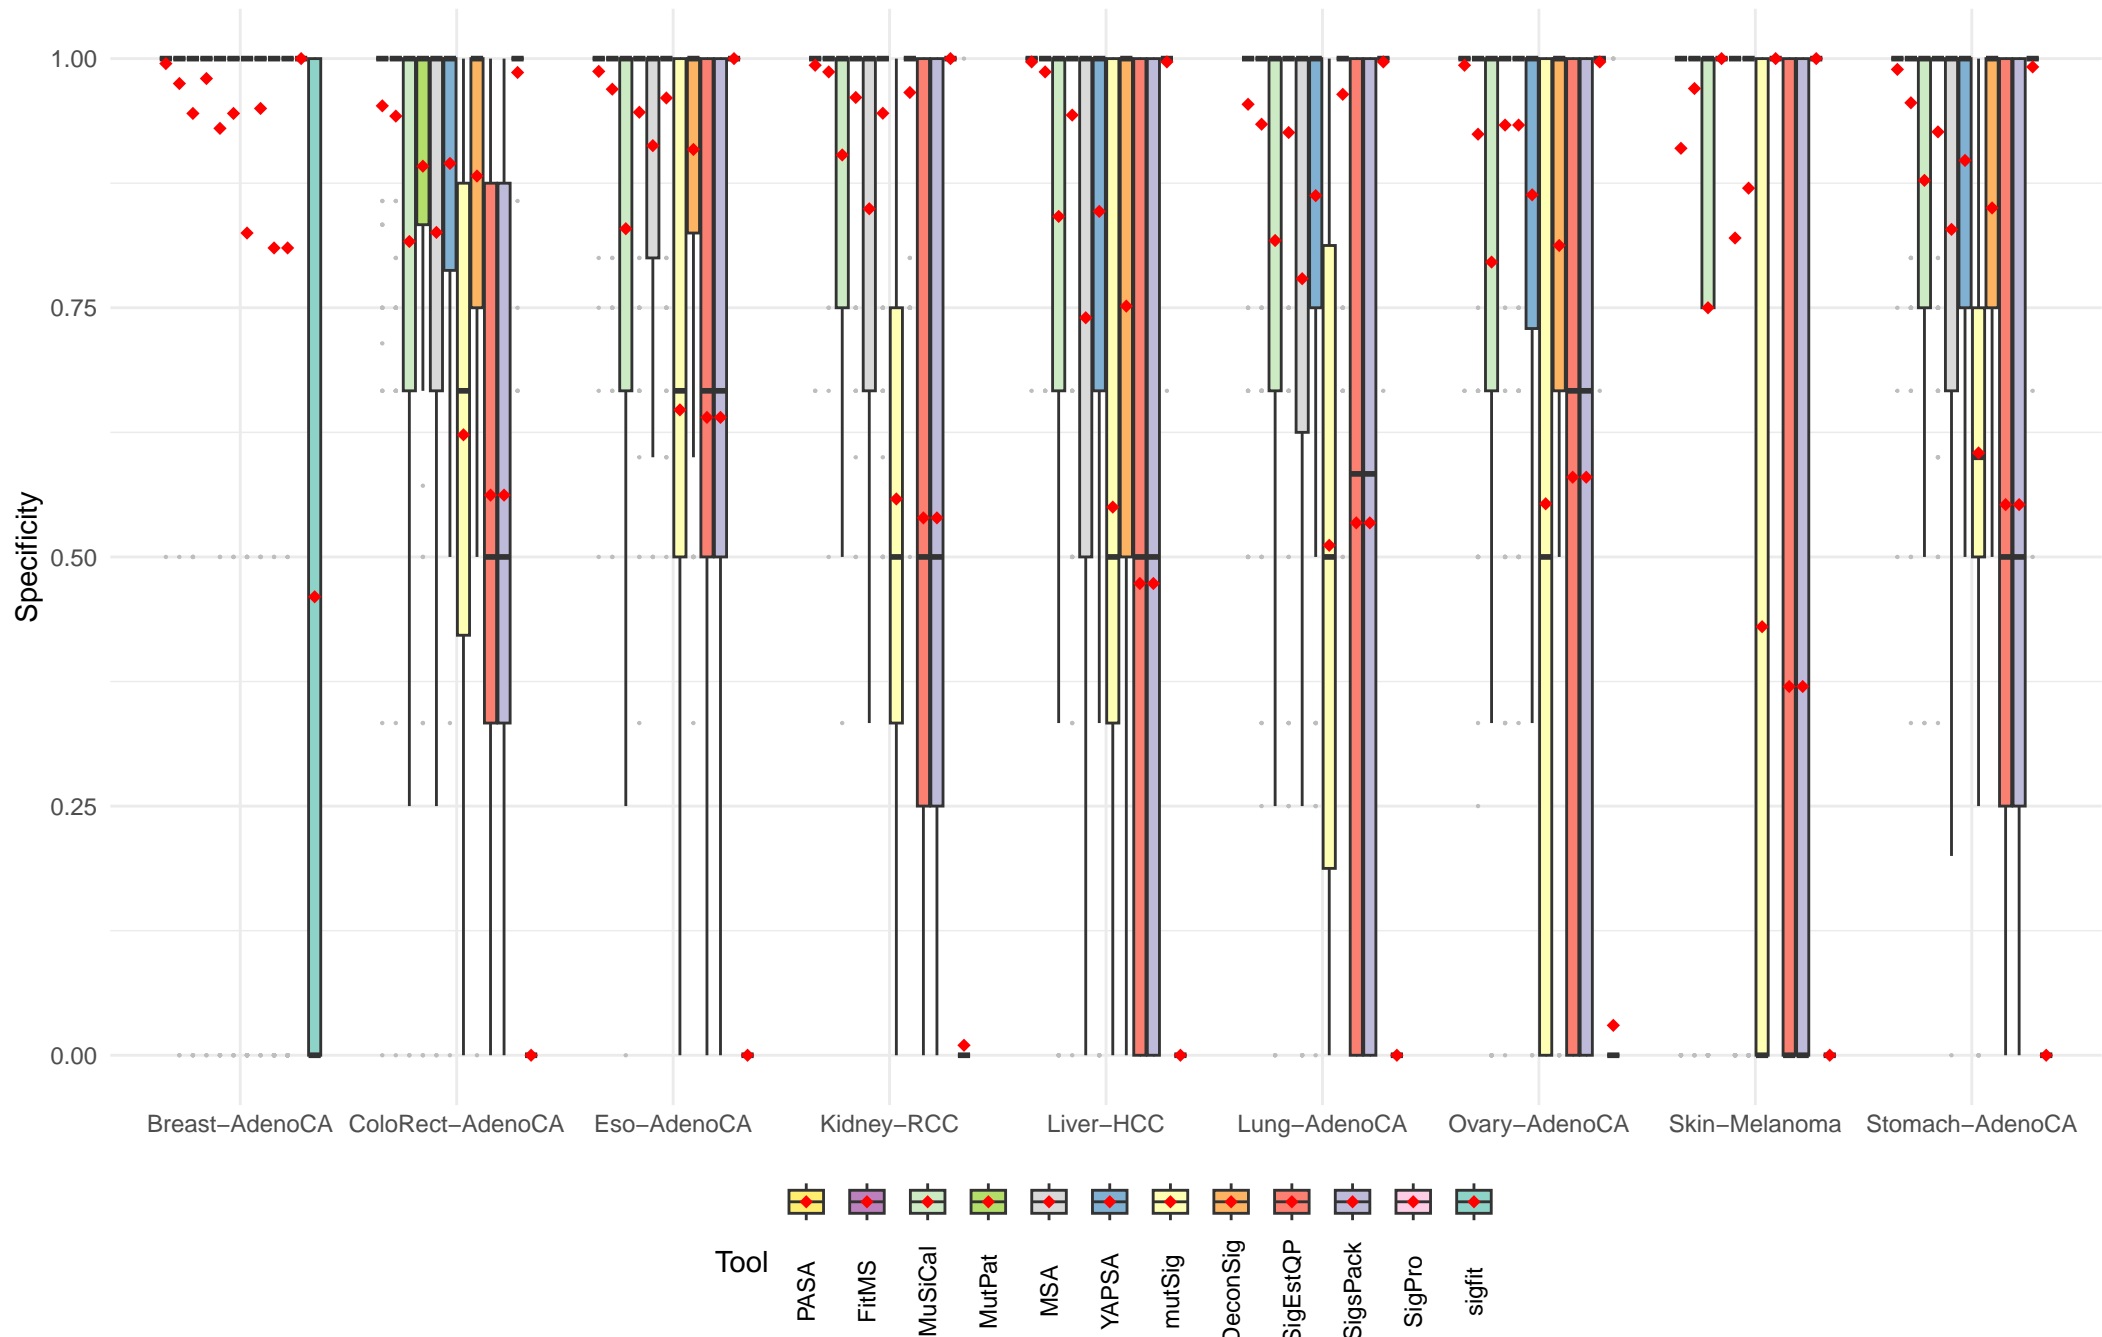

Supplementary Figure S5F, 1 – scaled L2 distance by cancer type for DBS

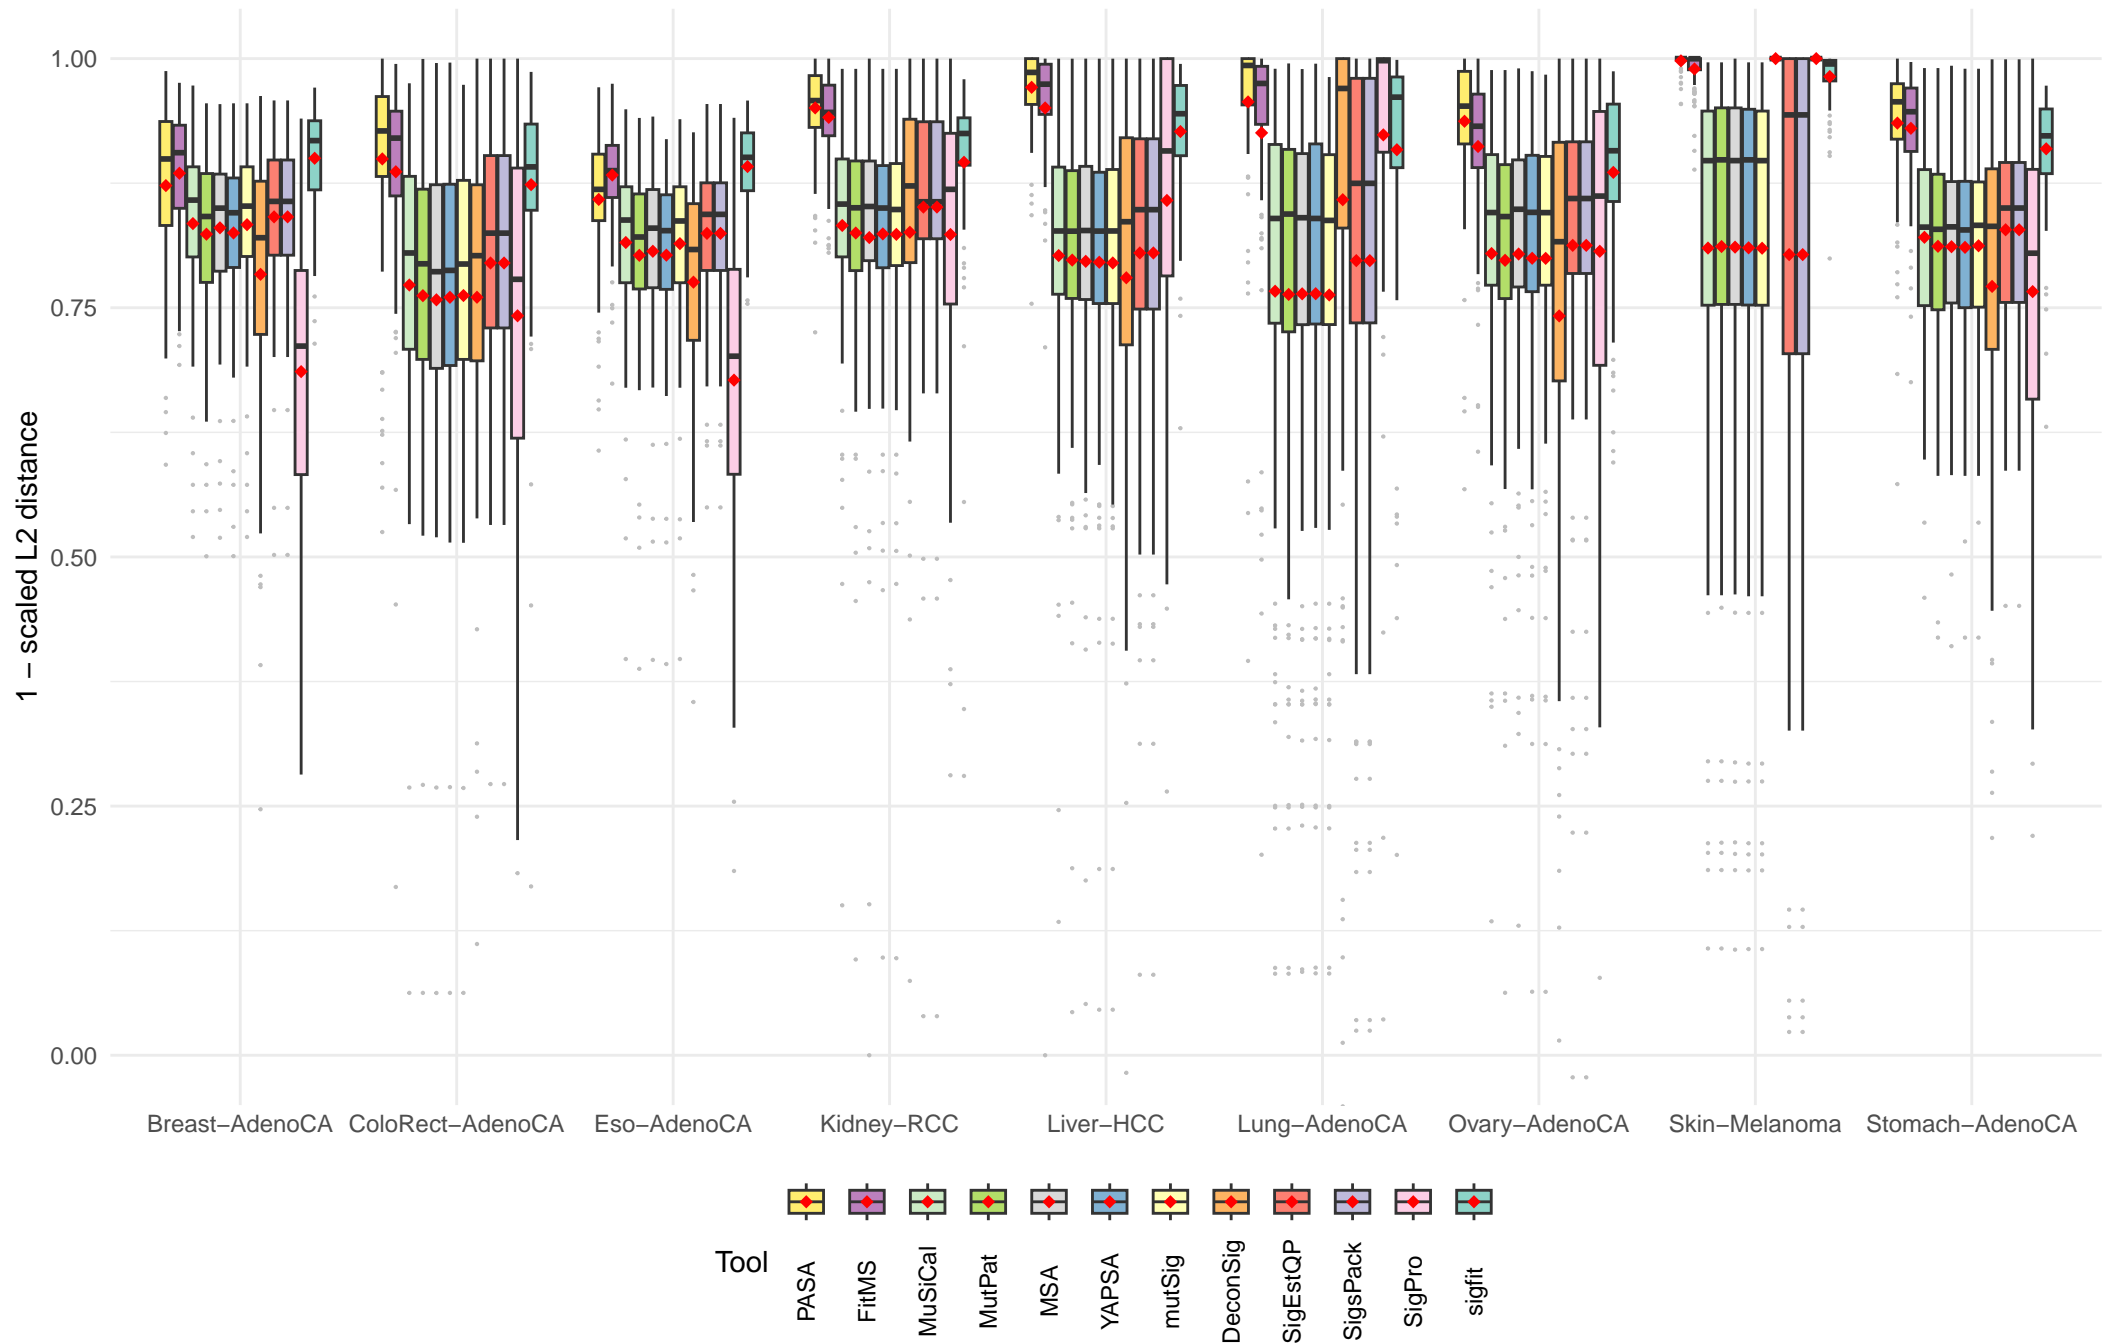

Supplementary Figure S5G,  $\log_2(\text{KL divergence} + 1)$  by cancer type for DBS

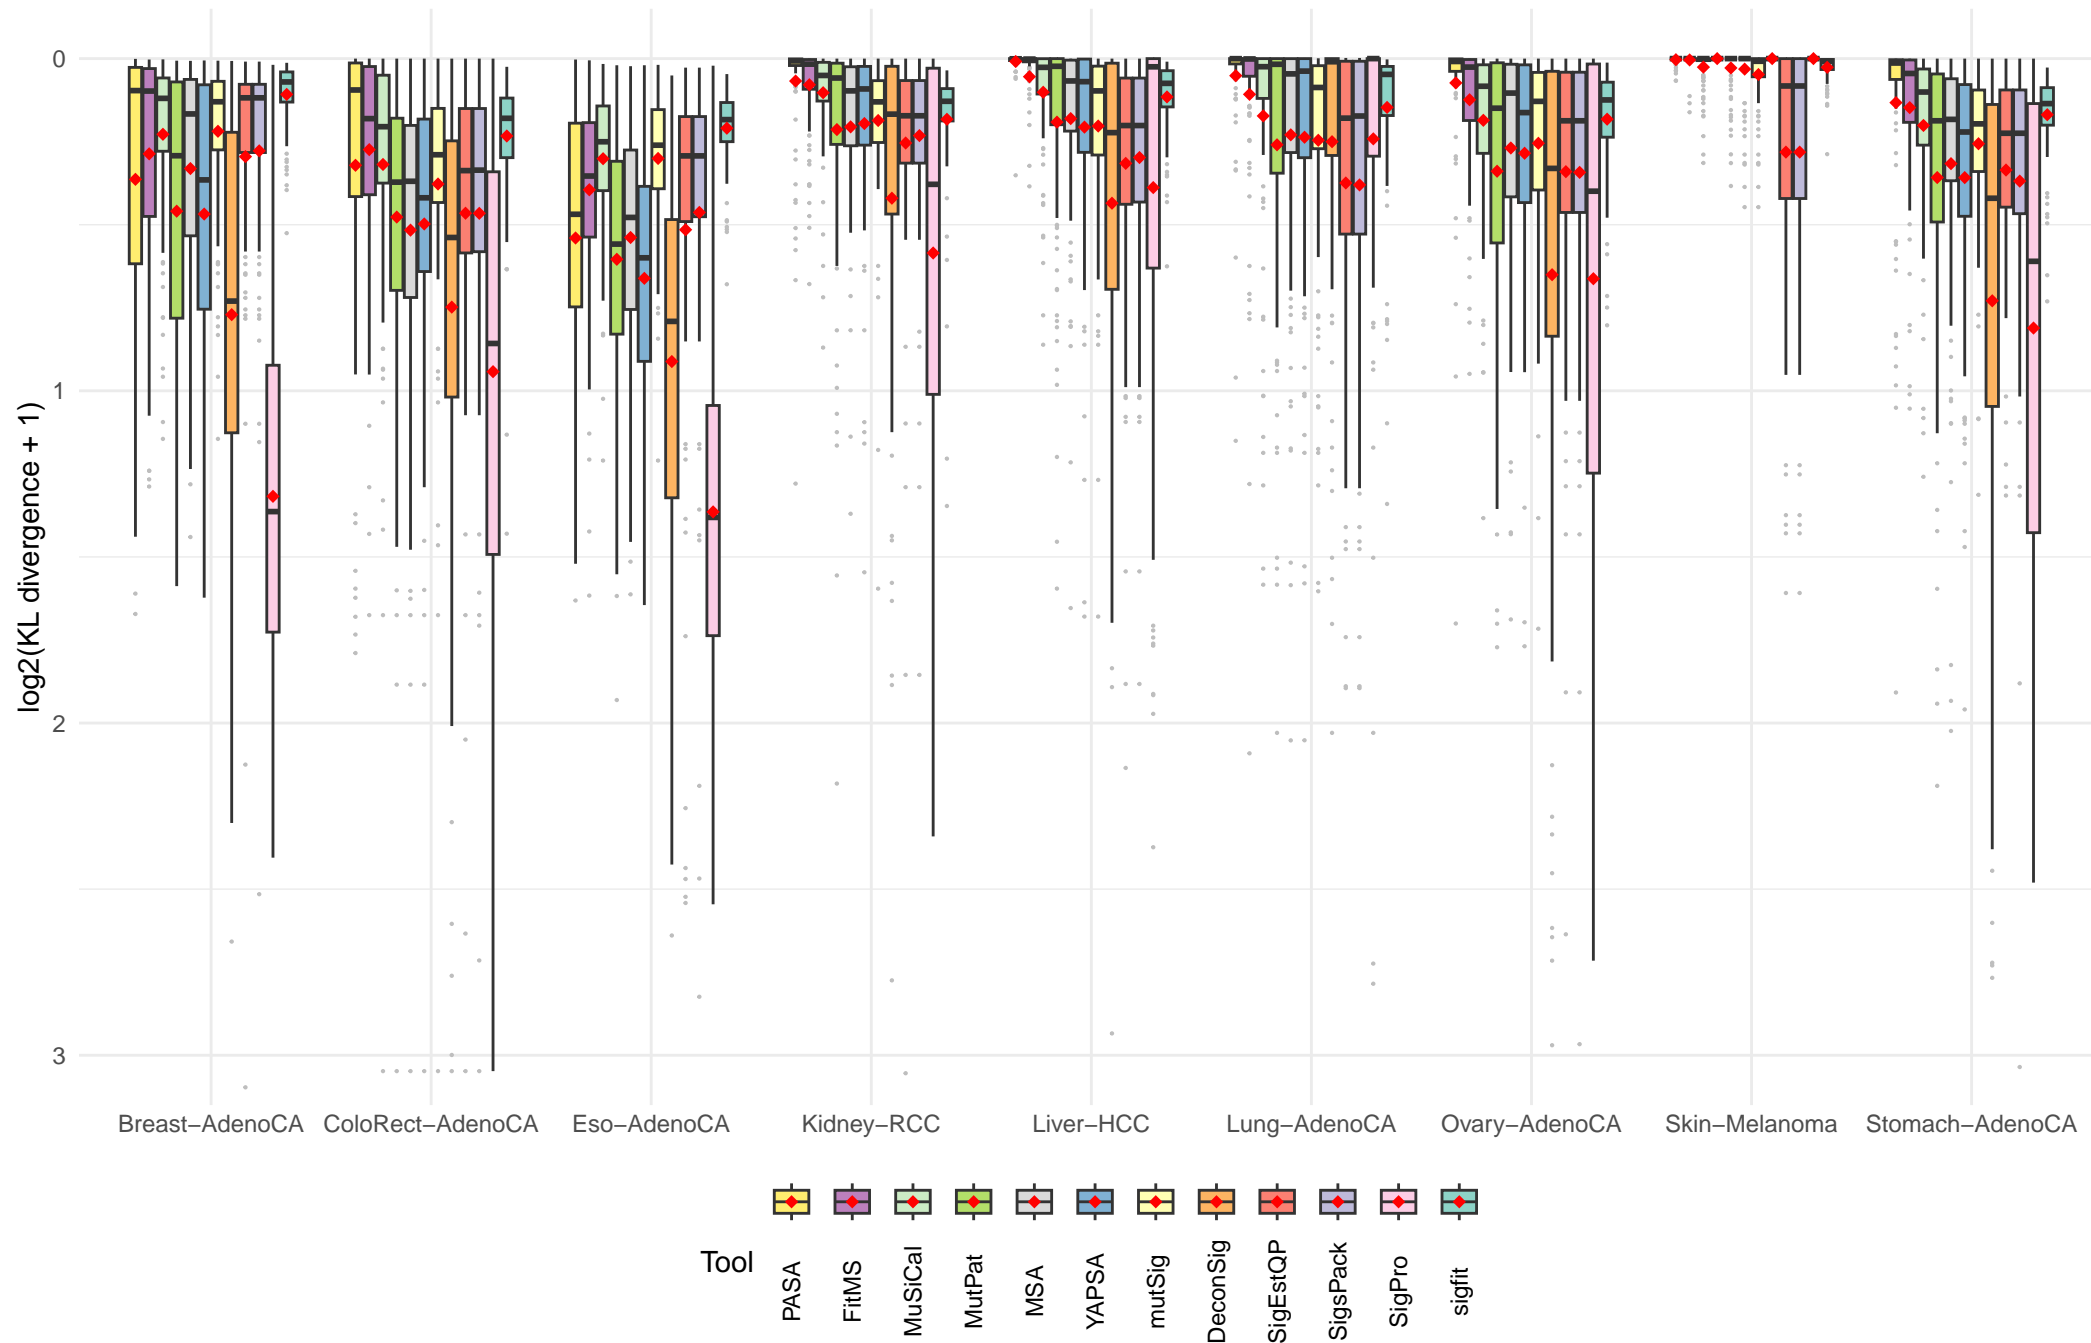

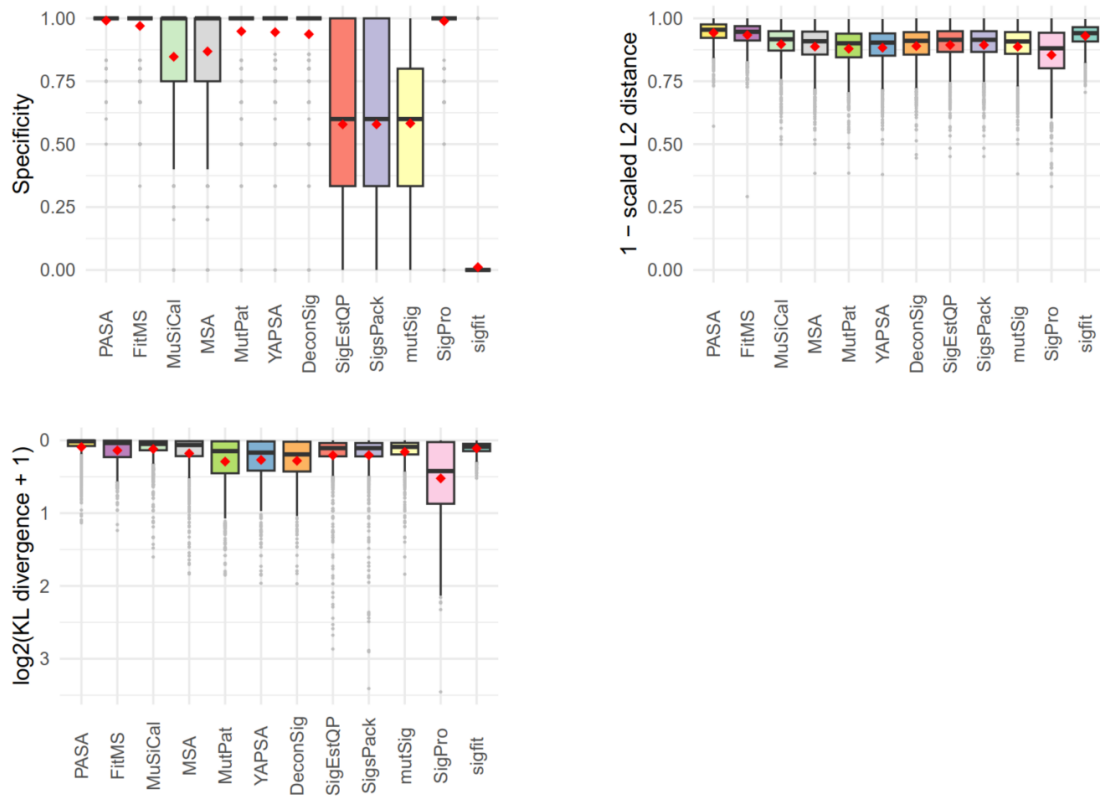

**Figure S6.** Accuracy of mutational signature attribution approaches over all synthetic ID spectra. Scaled L2 distance is the Euclidean distance between the estimated and ground truth attribution divided by the total mutation count. KL divergence is the Kullback–Leibler divergence between the estimated and ground truth attribution. Dark horizontal lines indicate medians. Red diamonds indicate means. The attribution approaches are ordered by descending mean of the Combined score for all cancer types from highest to lowest. See main Figure 5 for more details. Abbreviations for attribution approaches are listed in Table 1.

**Figure S7 (the next 7 pages).** Accuracy of mutational signature attribution approaches on synthetic ID data analyzed for each cancer type. **(A)** Combined Score, the sum of (1 – scaled Manhattan distance), precision and recall. **(B)** Scaled Manhattan distance is the Manhattan distance between the spectrum and the reconstructed spectrum divided by the total mutation count. **(C)** Precision. **(D)** Recall (sensitivity). **(E)** Specificity. **(F)** Scaled L2 distance, the Euclidean distance between the estimated and ground truth attribution divided by the total mutation count. **(G)** KL divergence, the Kullback–Leibler divergence between the estimated and ground truth attribution. Dark horizontal lines indicate medians, red diamonds indicate means. The attribution approaches are ordered by descending mean of the Combined score for all cancer types from highest to lowest (main text Figure 5). Abbreviations for attribution approaches are listed in Table 1. Abbreviations of cancer types are as in Alexandrov et al., 2020, doi: 10.1038/s41586-020-1943-3.

Supplementary Figure S7A, Combined Score by cancer type for ID

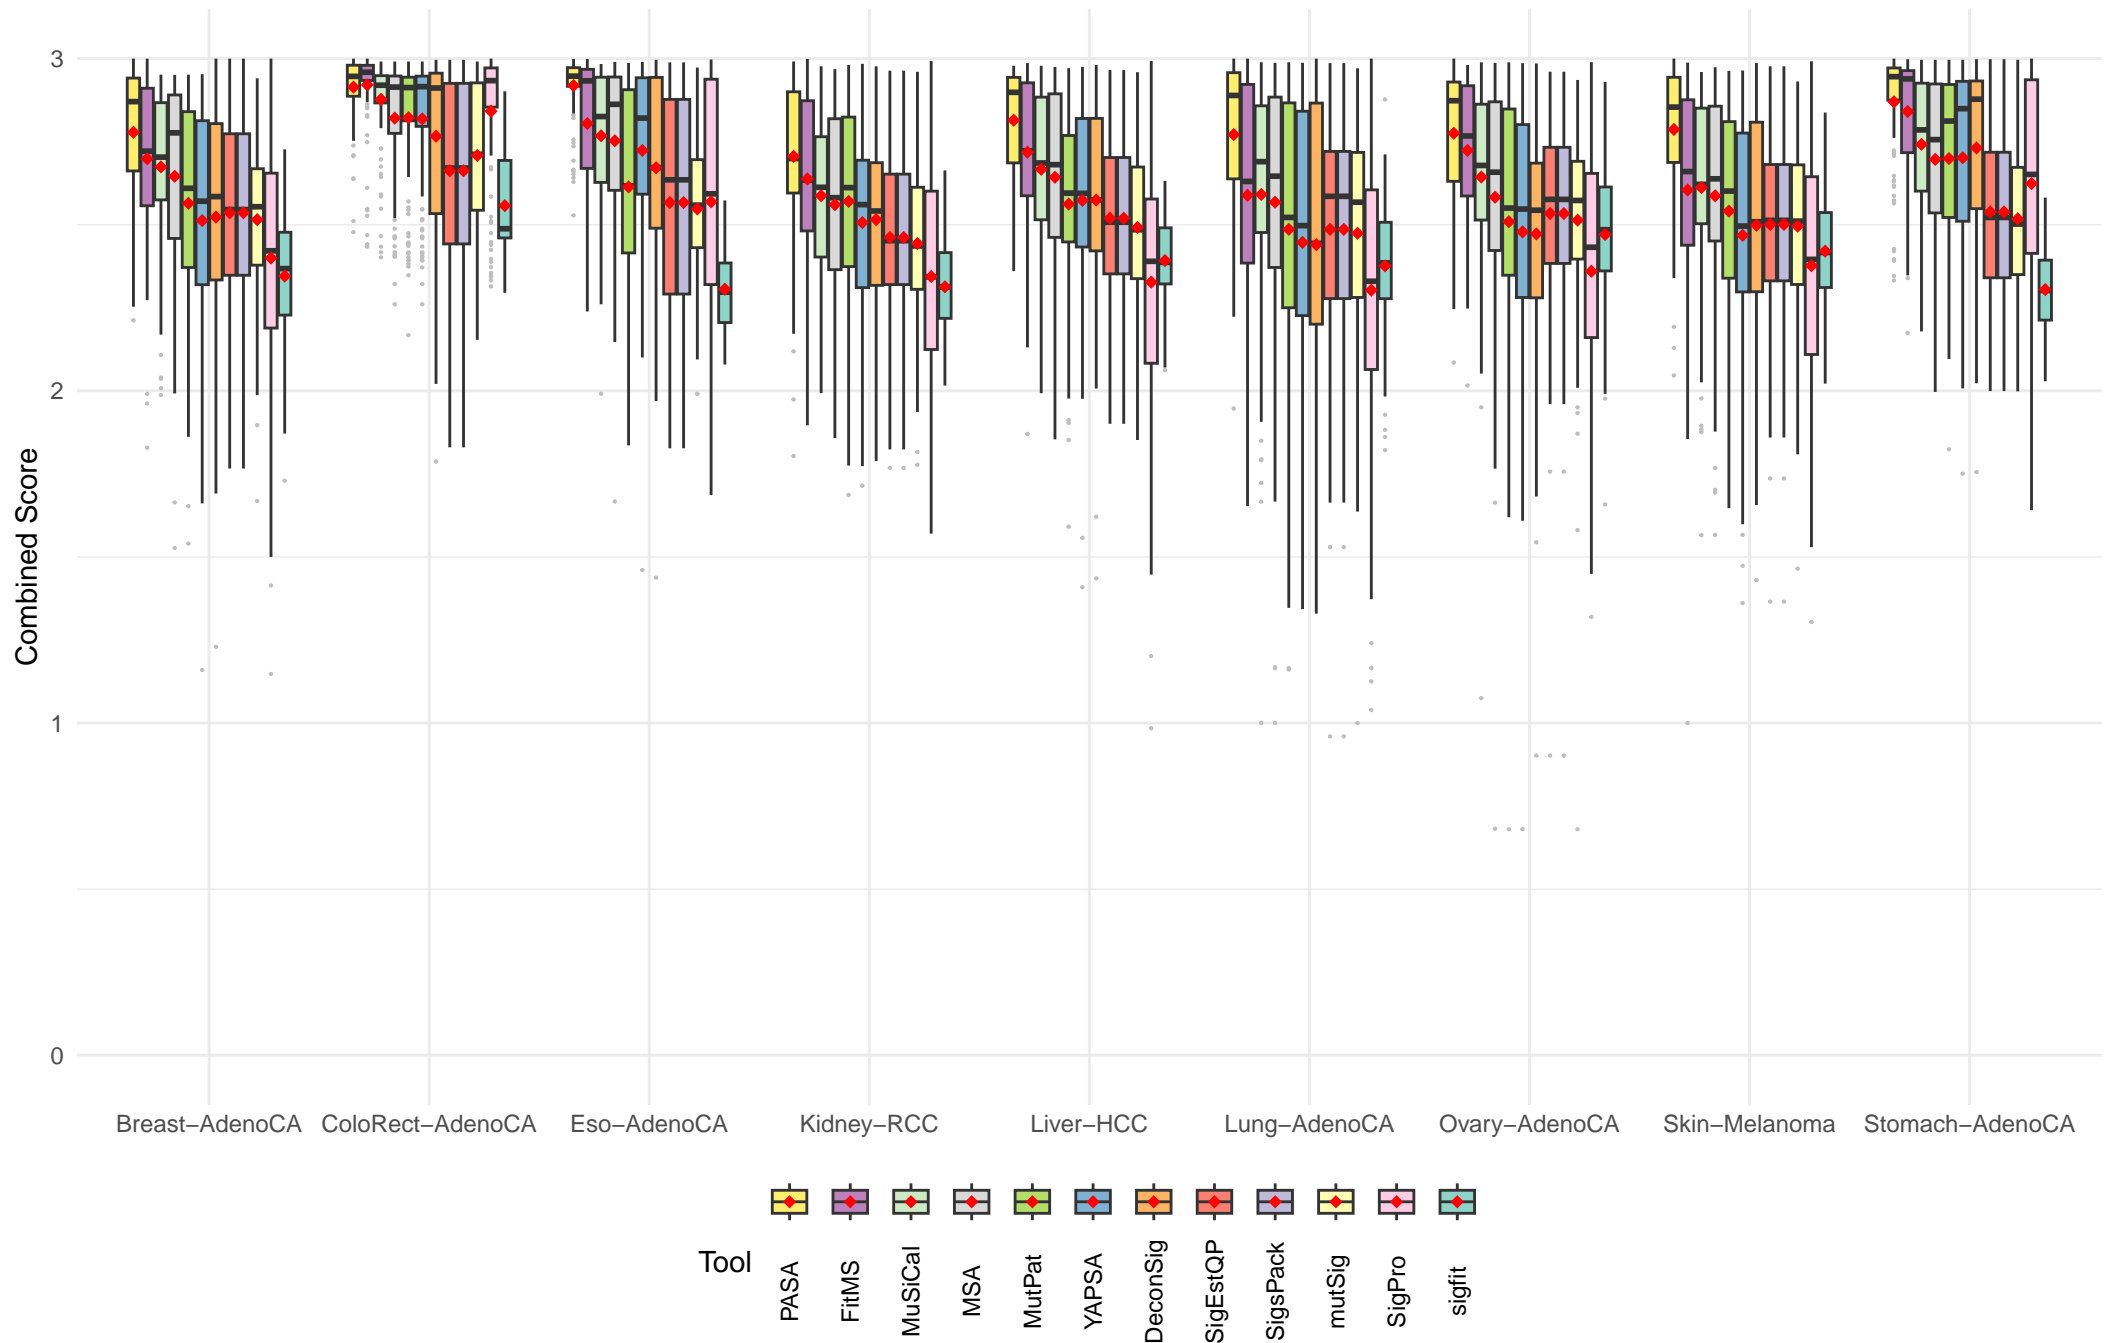

Supplementary Figure S7B, 1 – scaled Manhattan distance by cancer type for ID

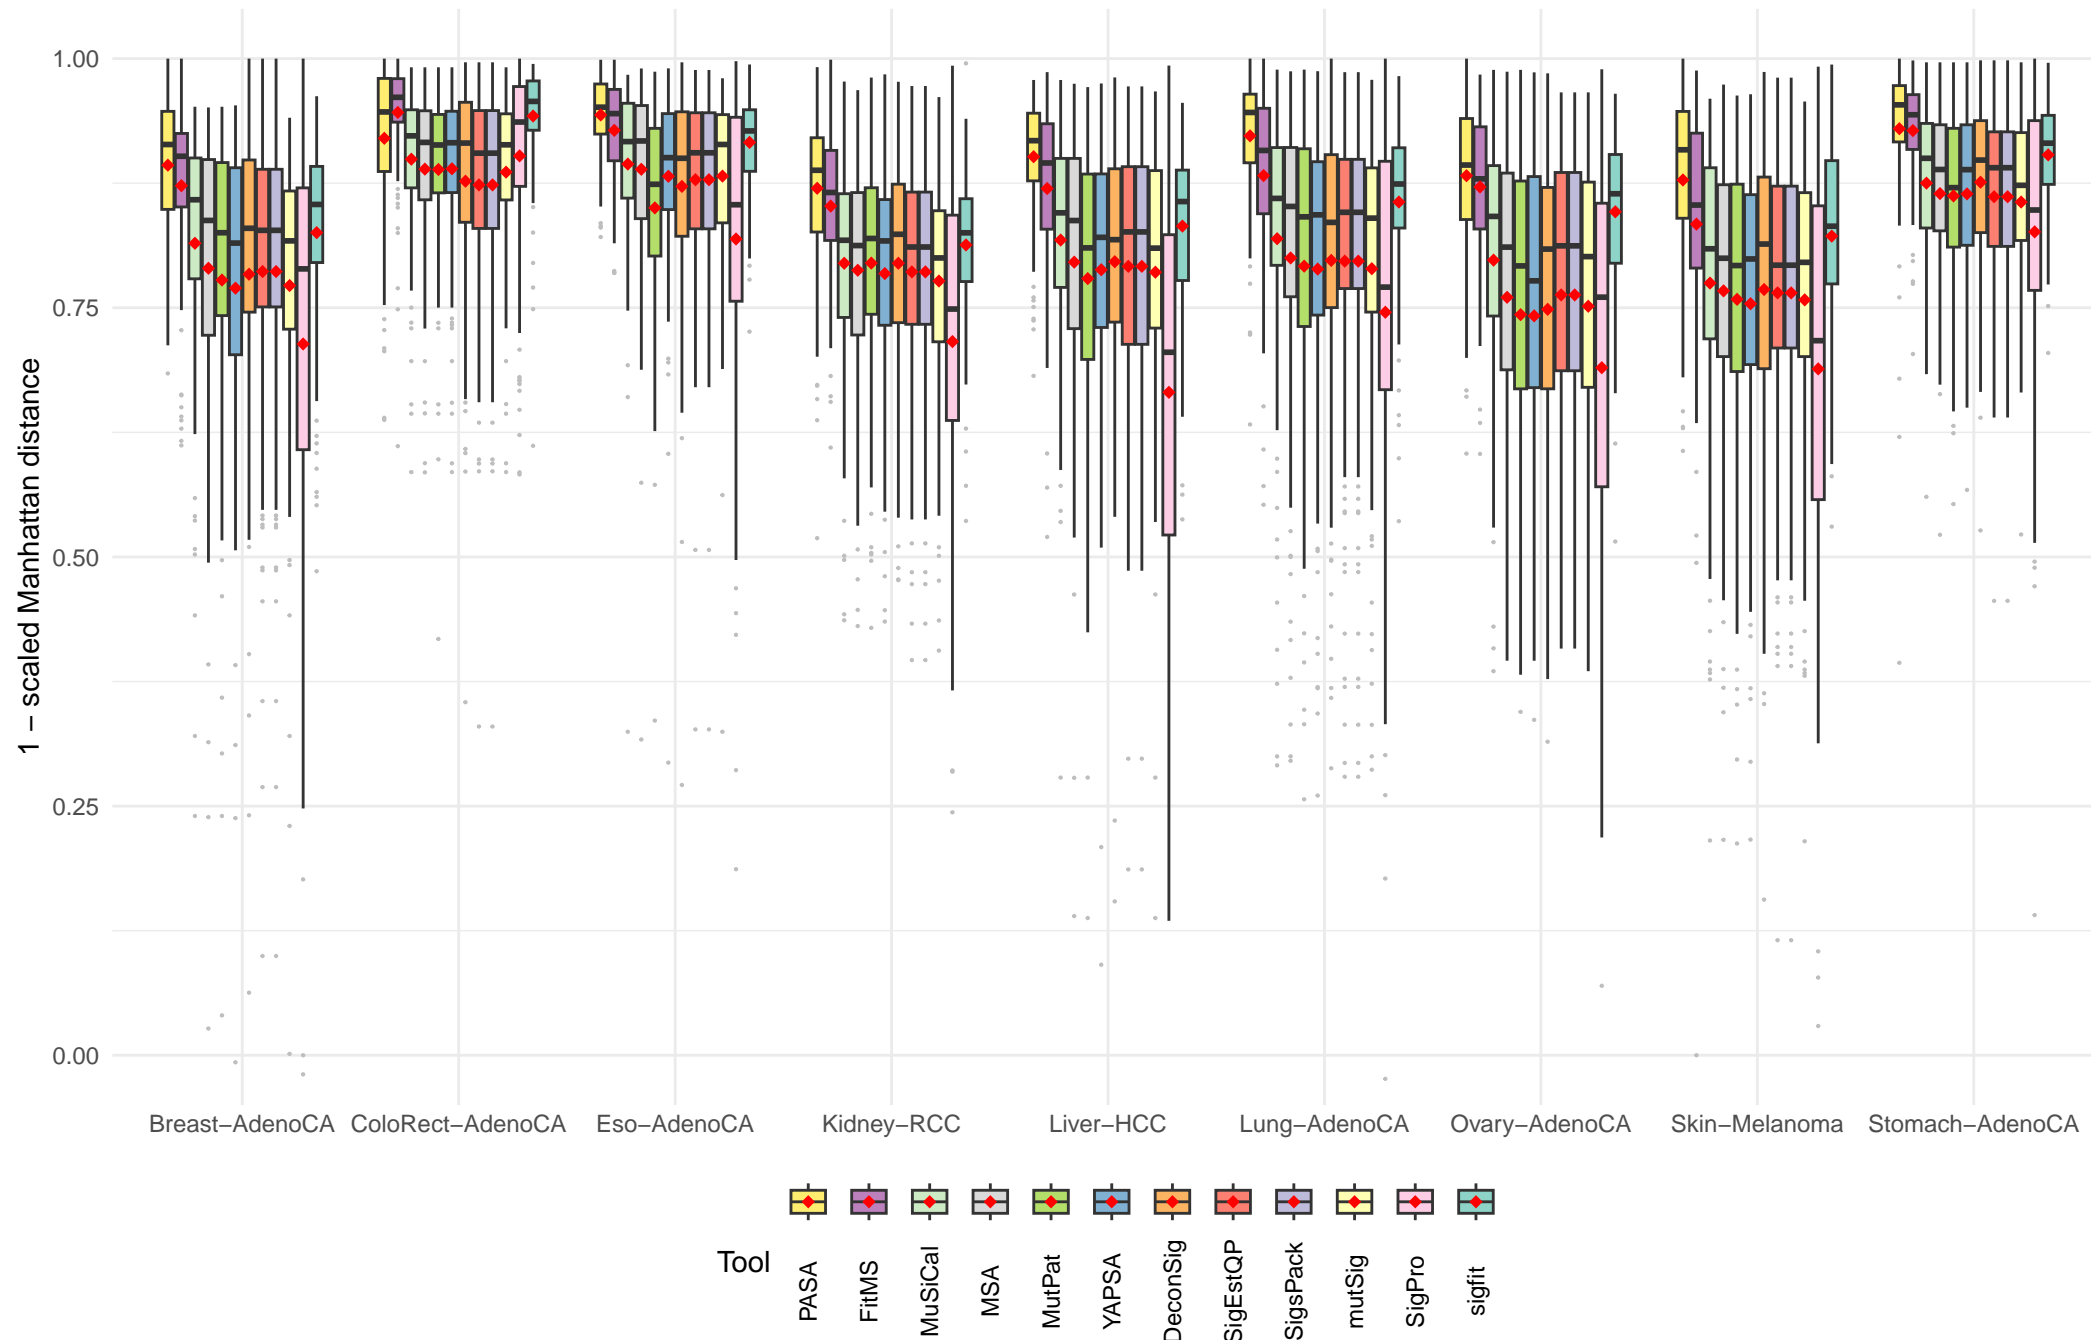



Supplementary Figure S7C, Precision by cancer type for ID

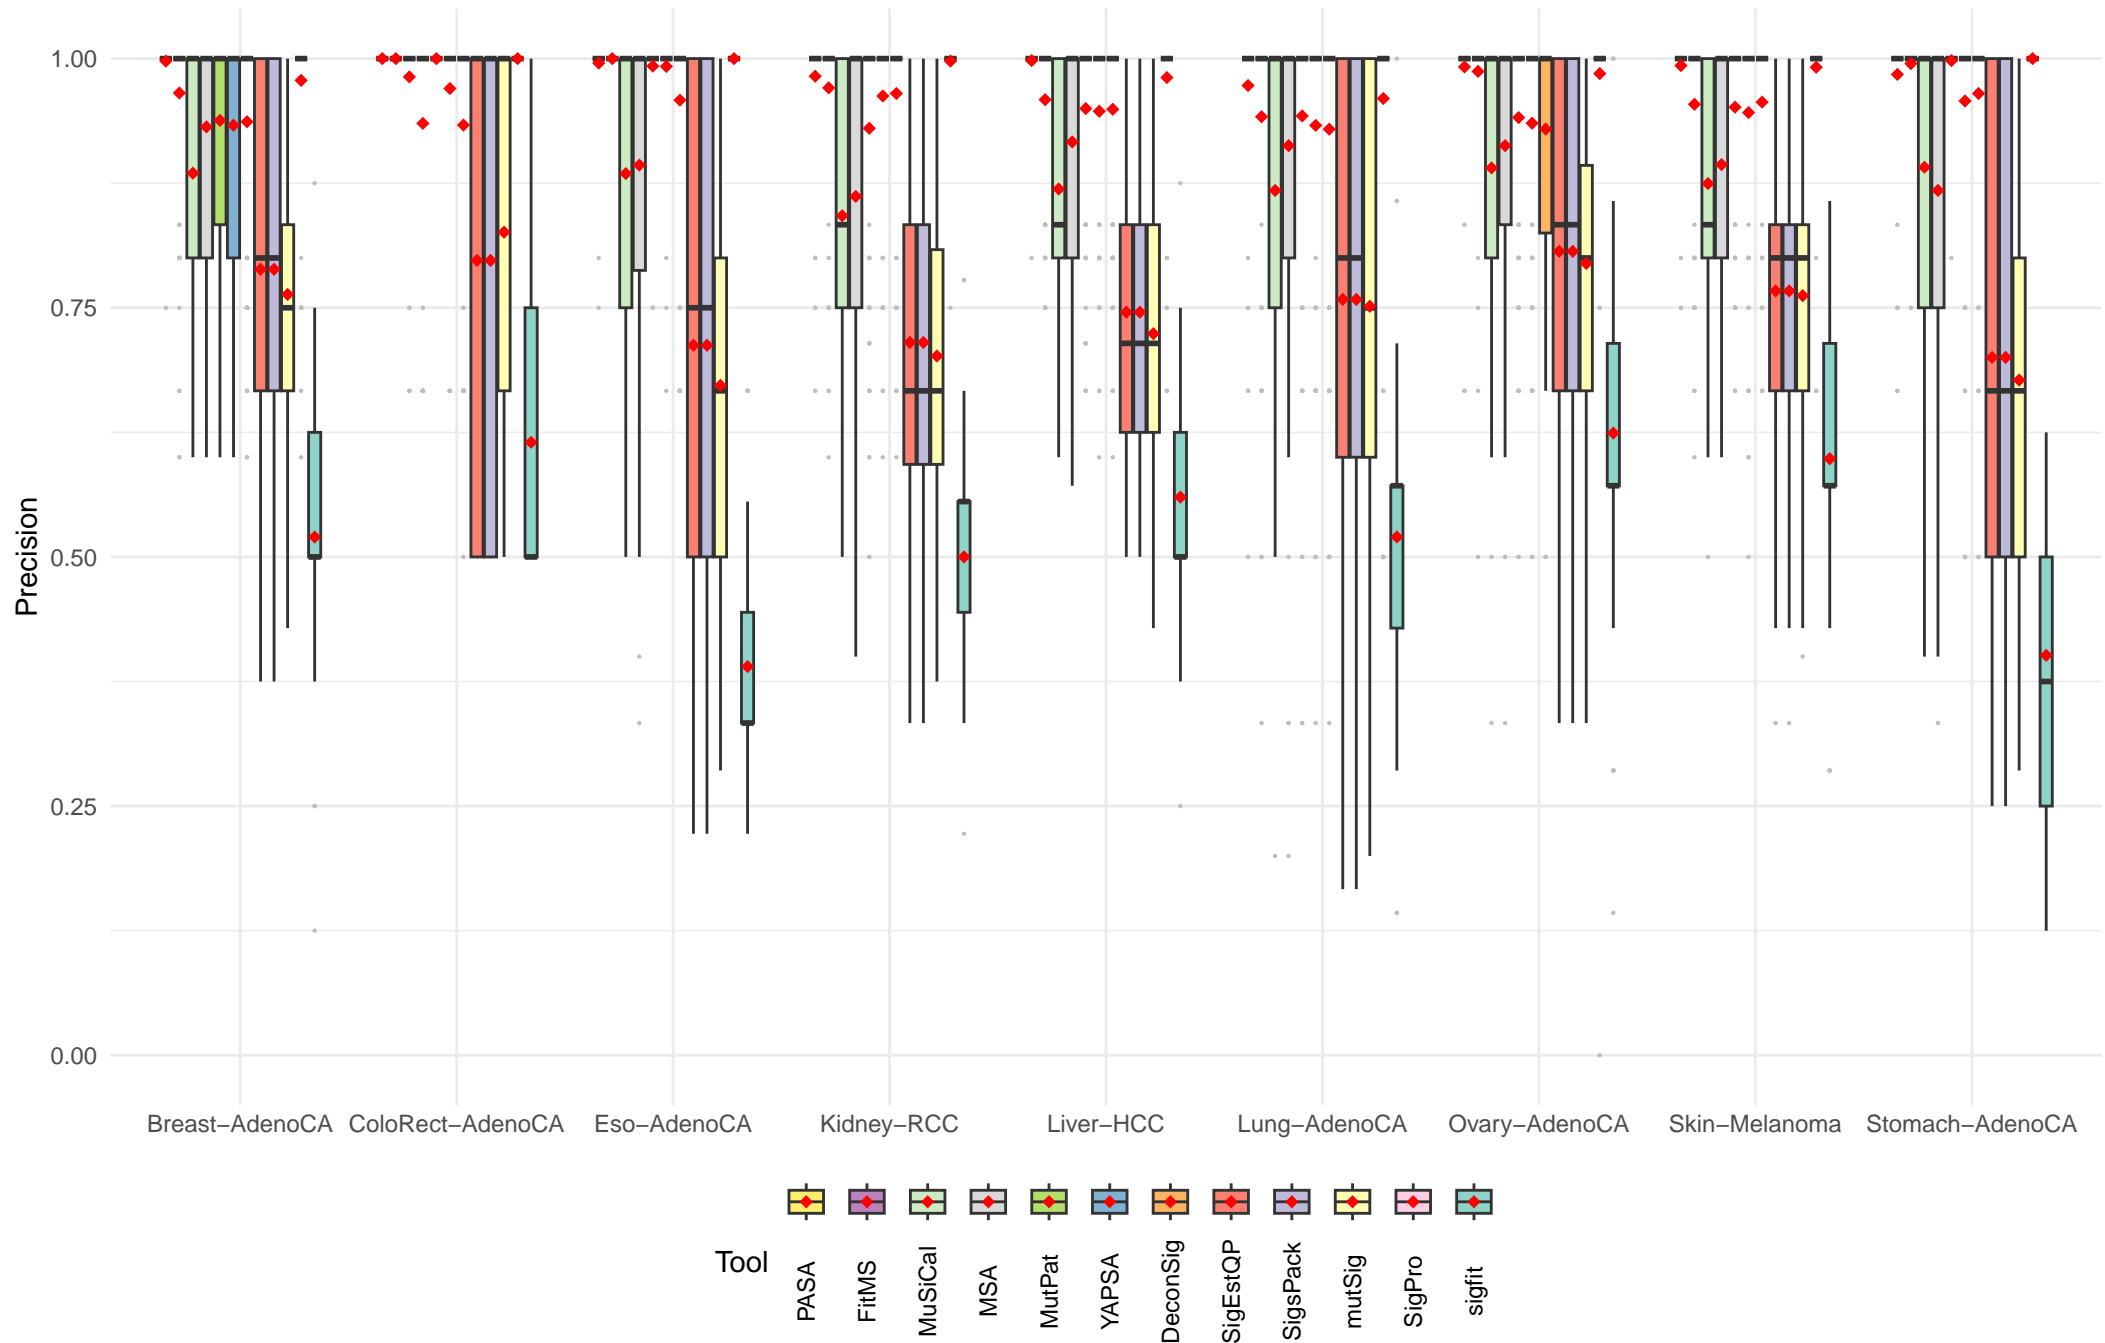

Supplementary Figure S7D, Recall (Sensitivity) by cancer type for ID

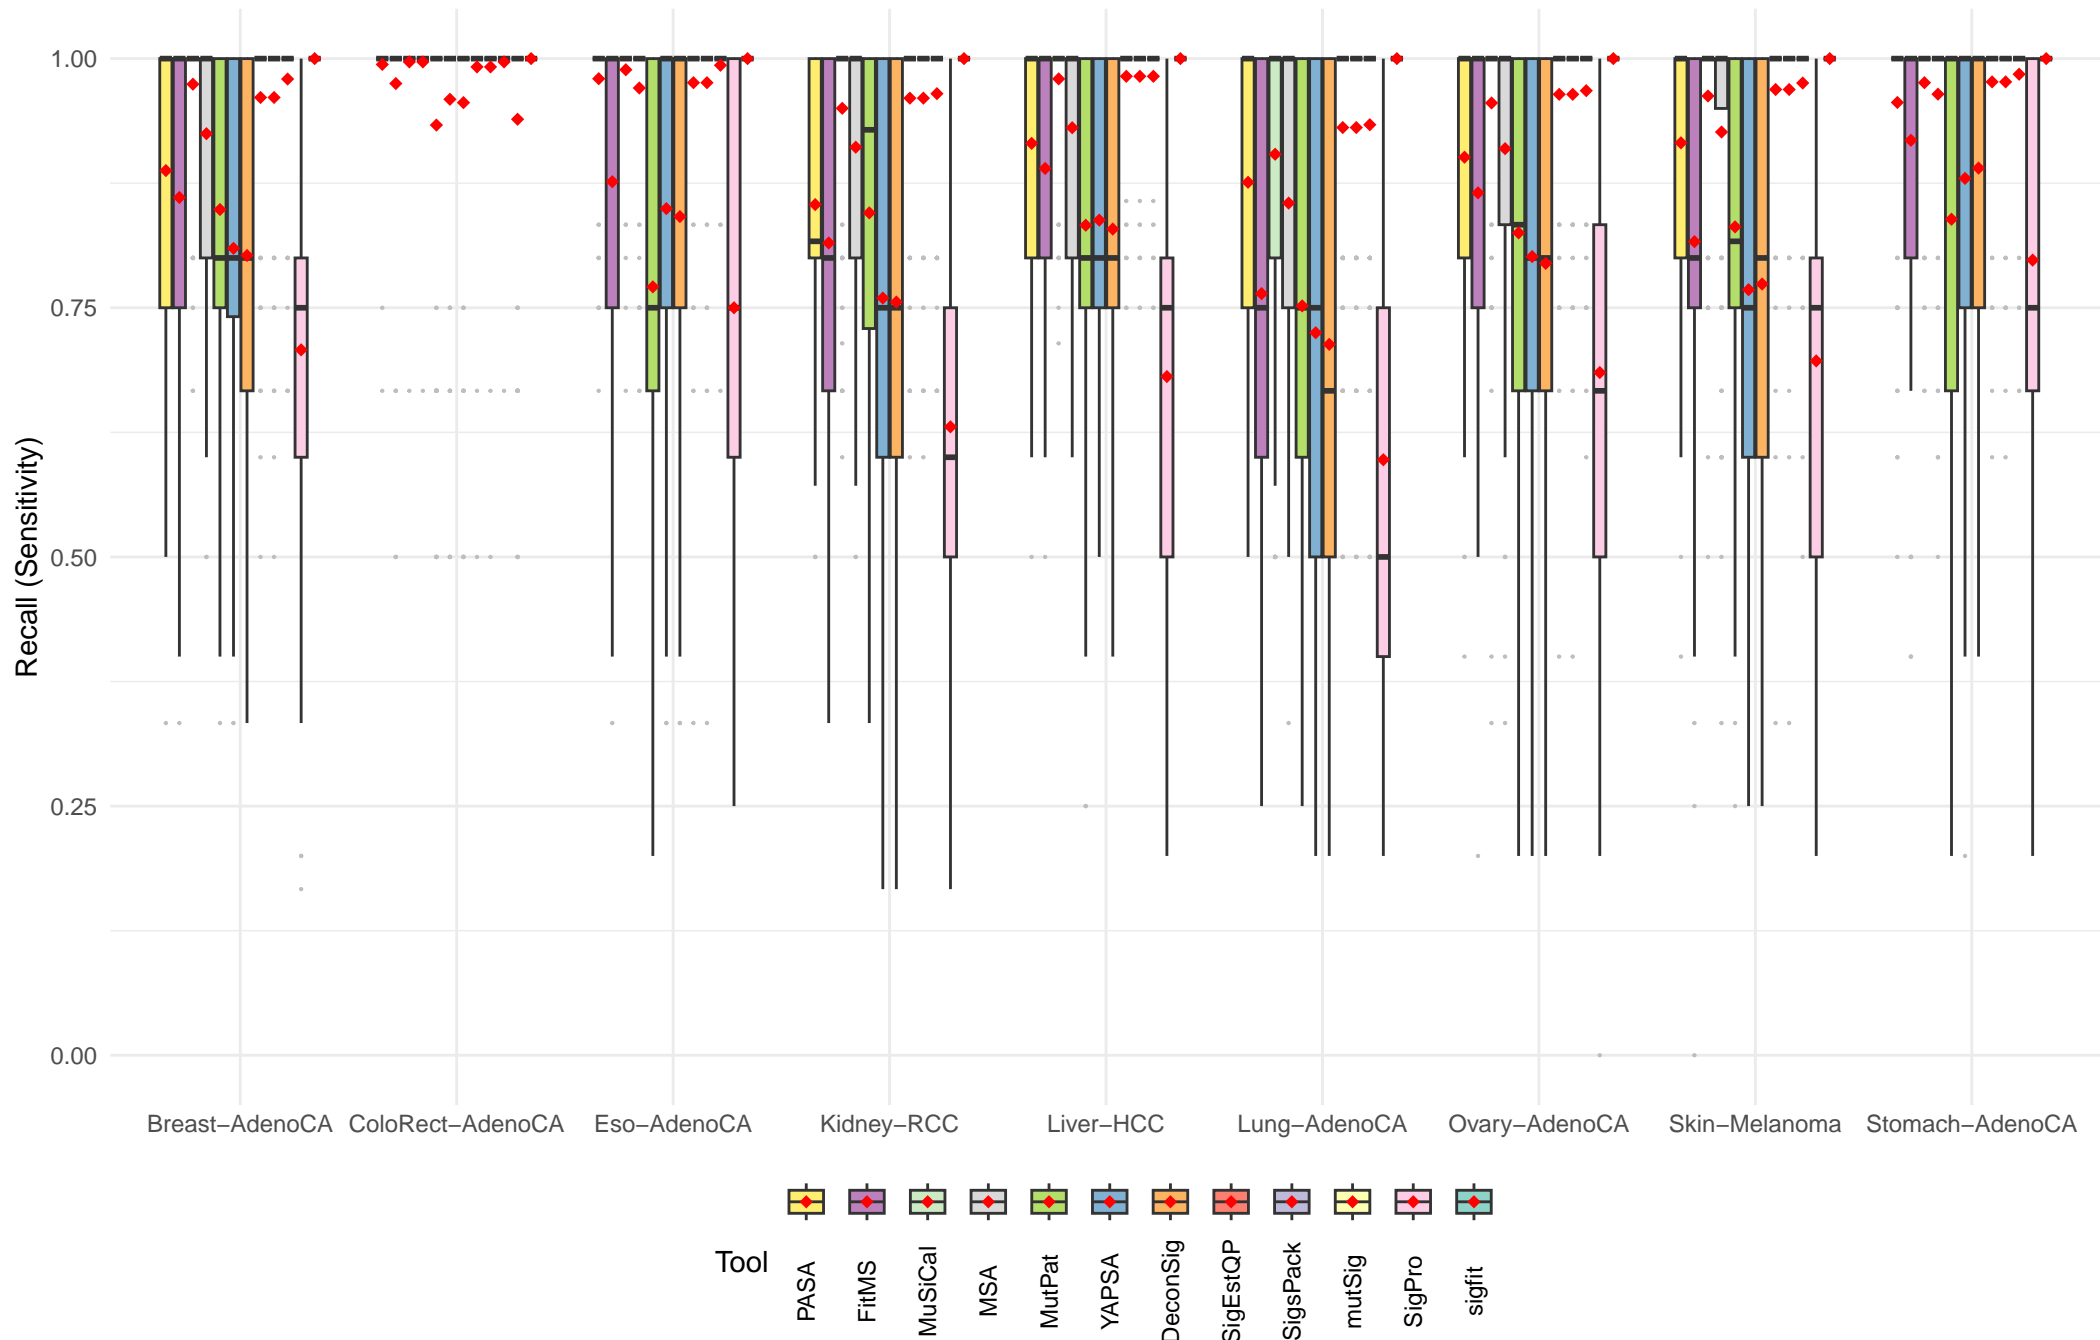

Supplementary Figure S7E, Specificity by cancer type for ID

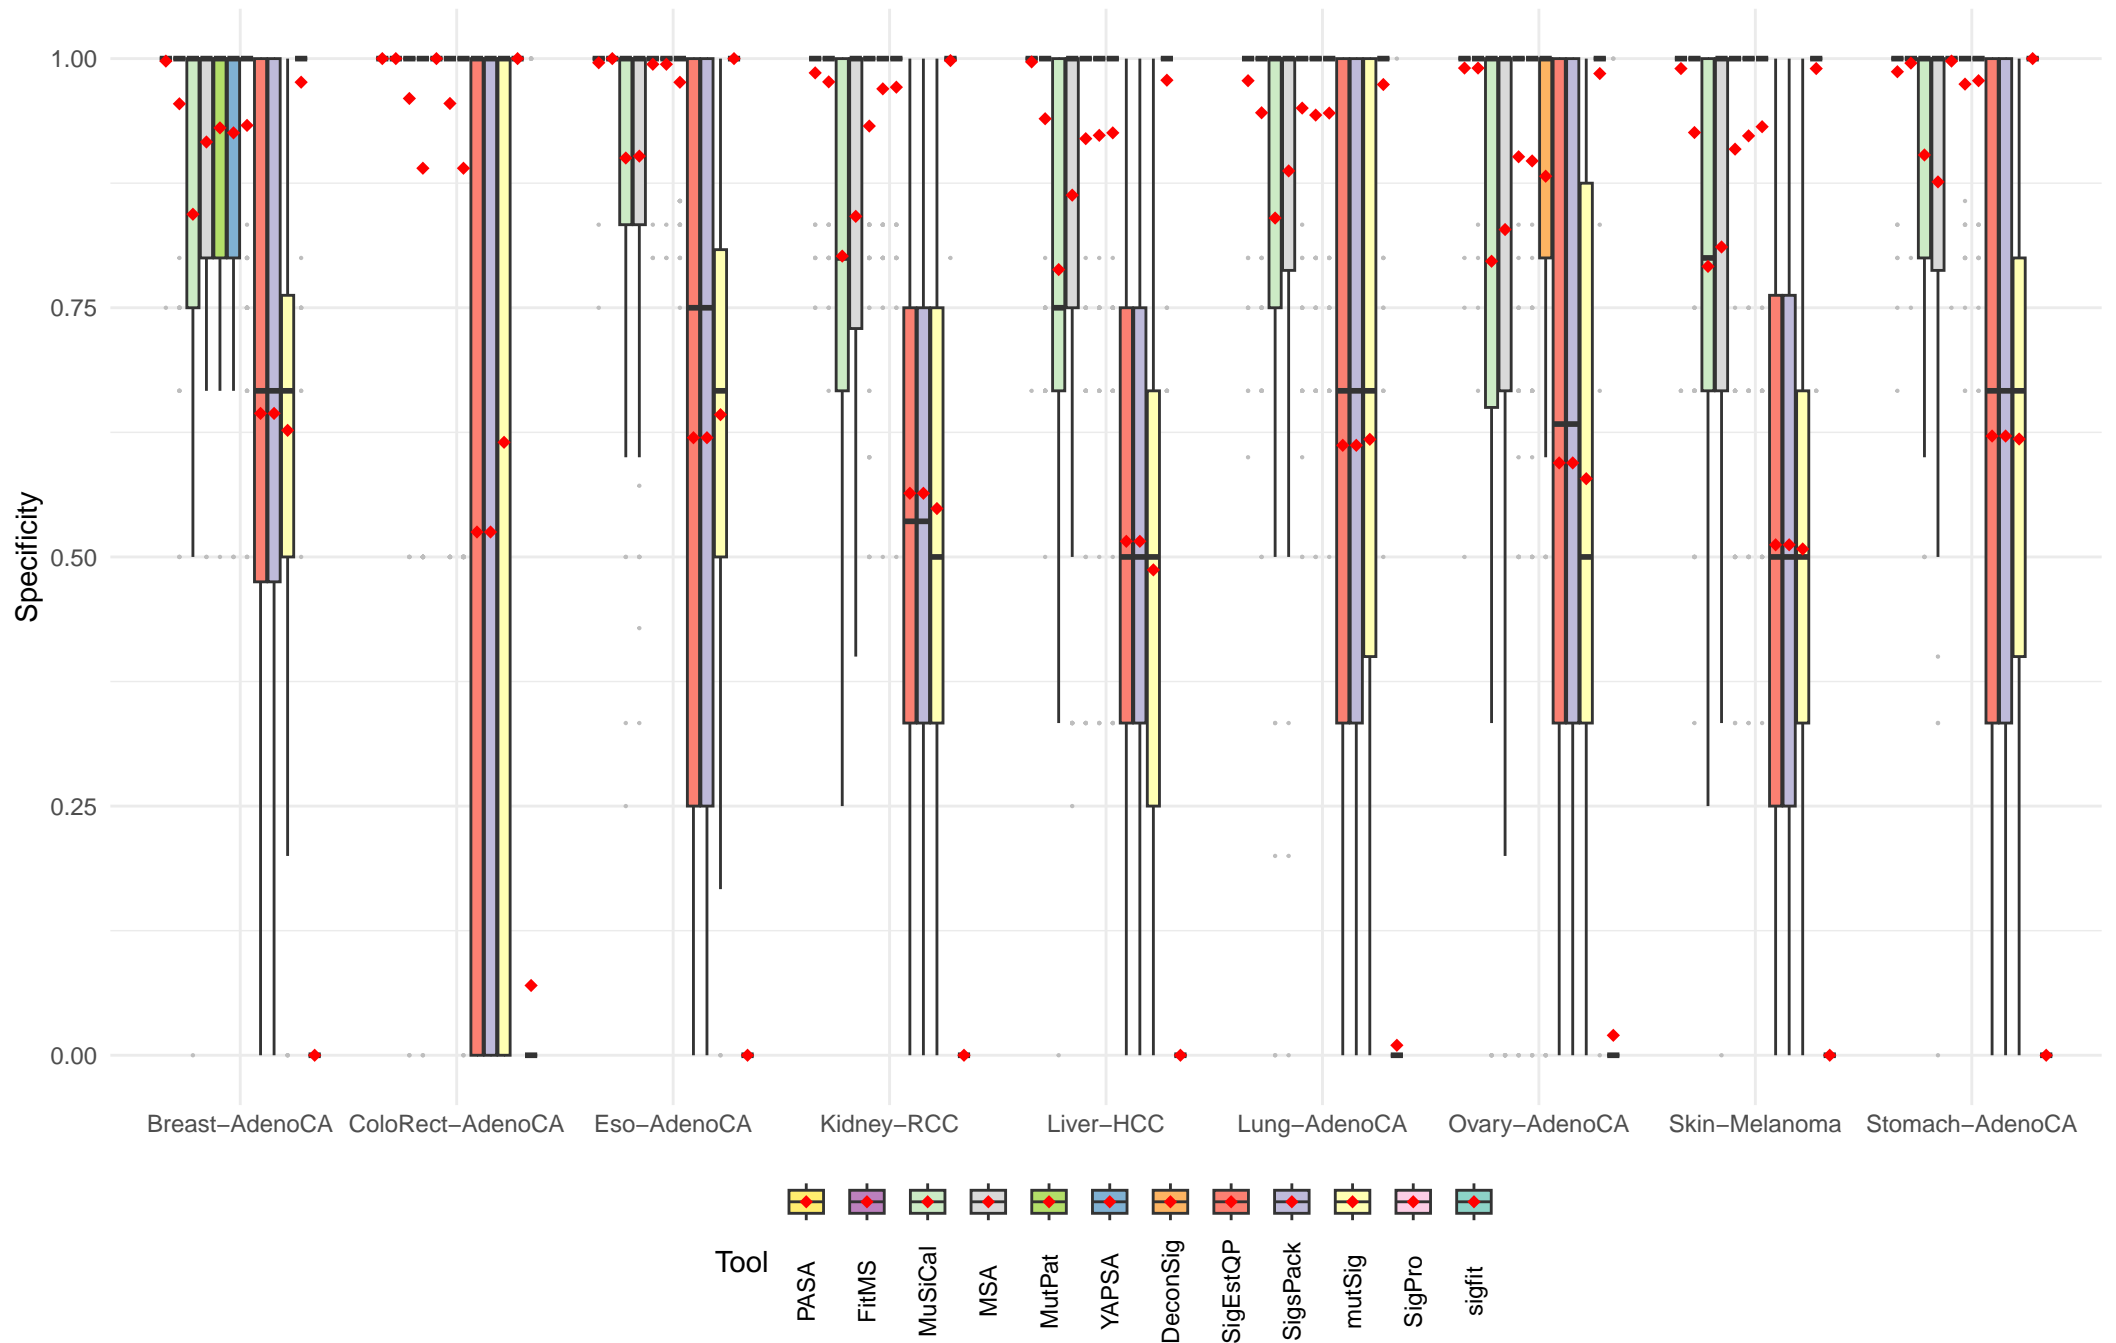

Supplementary Figure S7F, 1 – scaled L2 distance by cancer type for ID

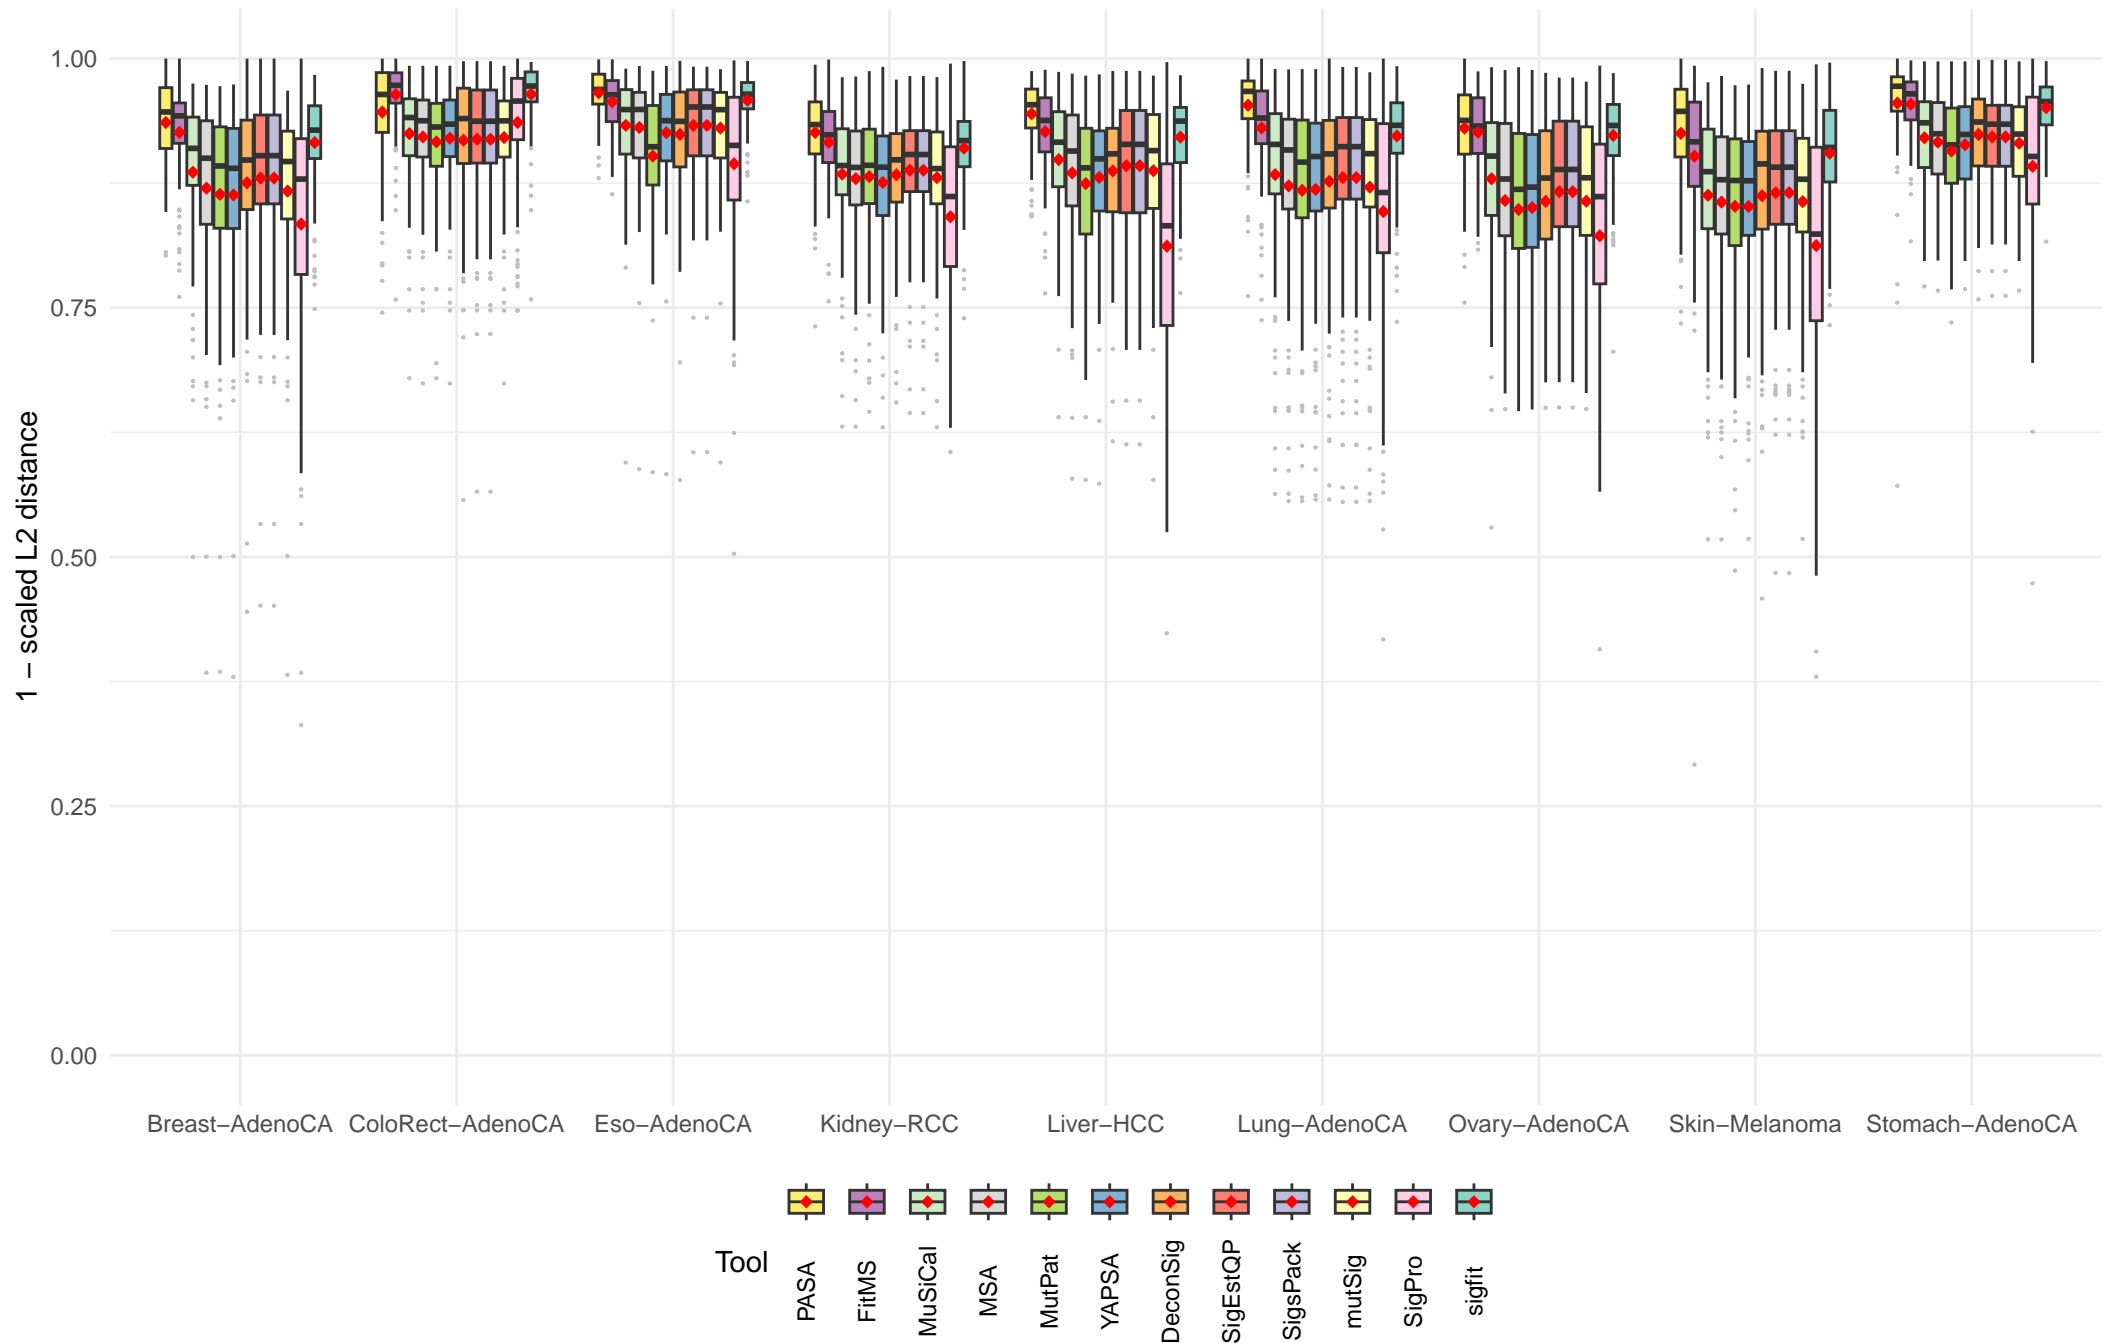

Supplementary Figure S7G,  $\log_2(\text{KL divergence} + 1)$  by cancer type for ID

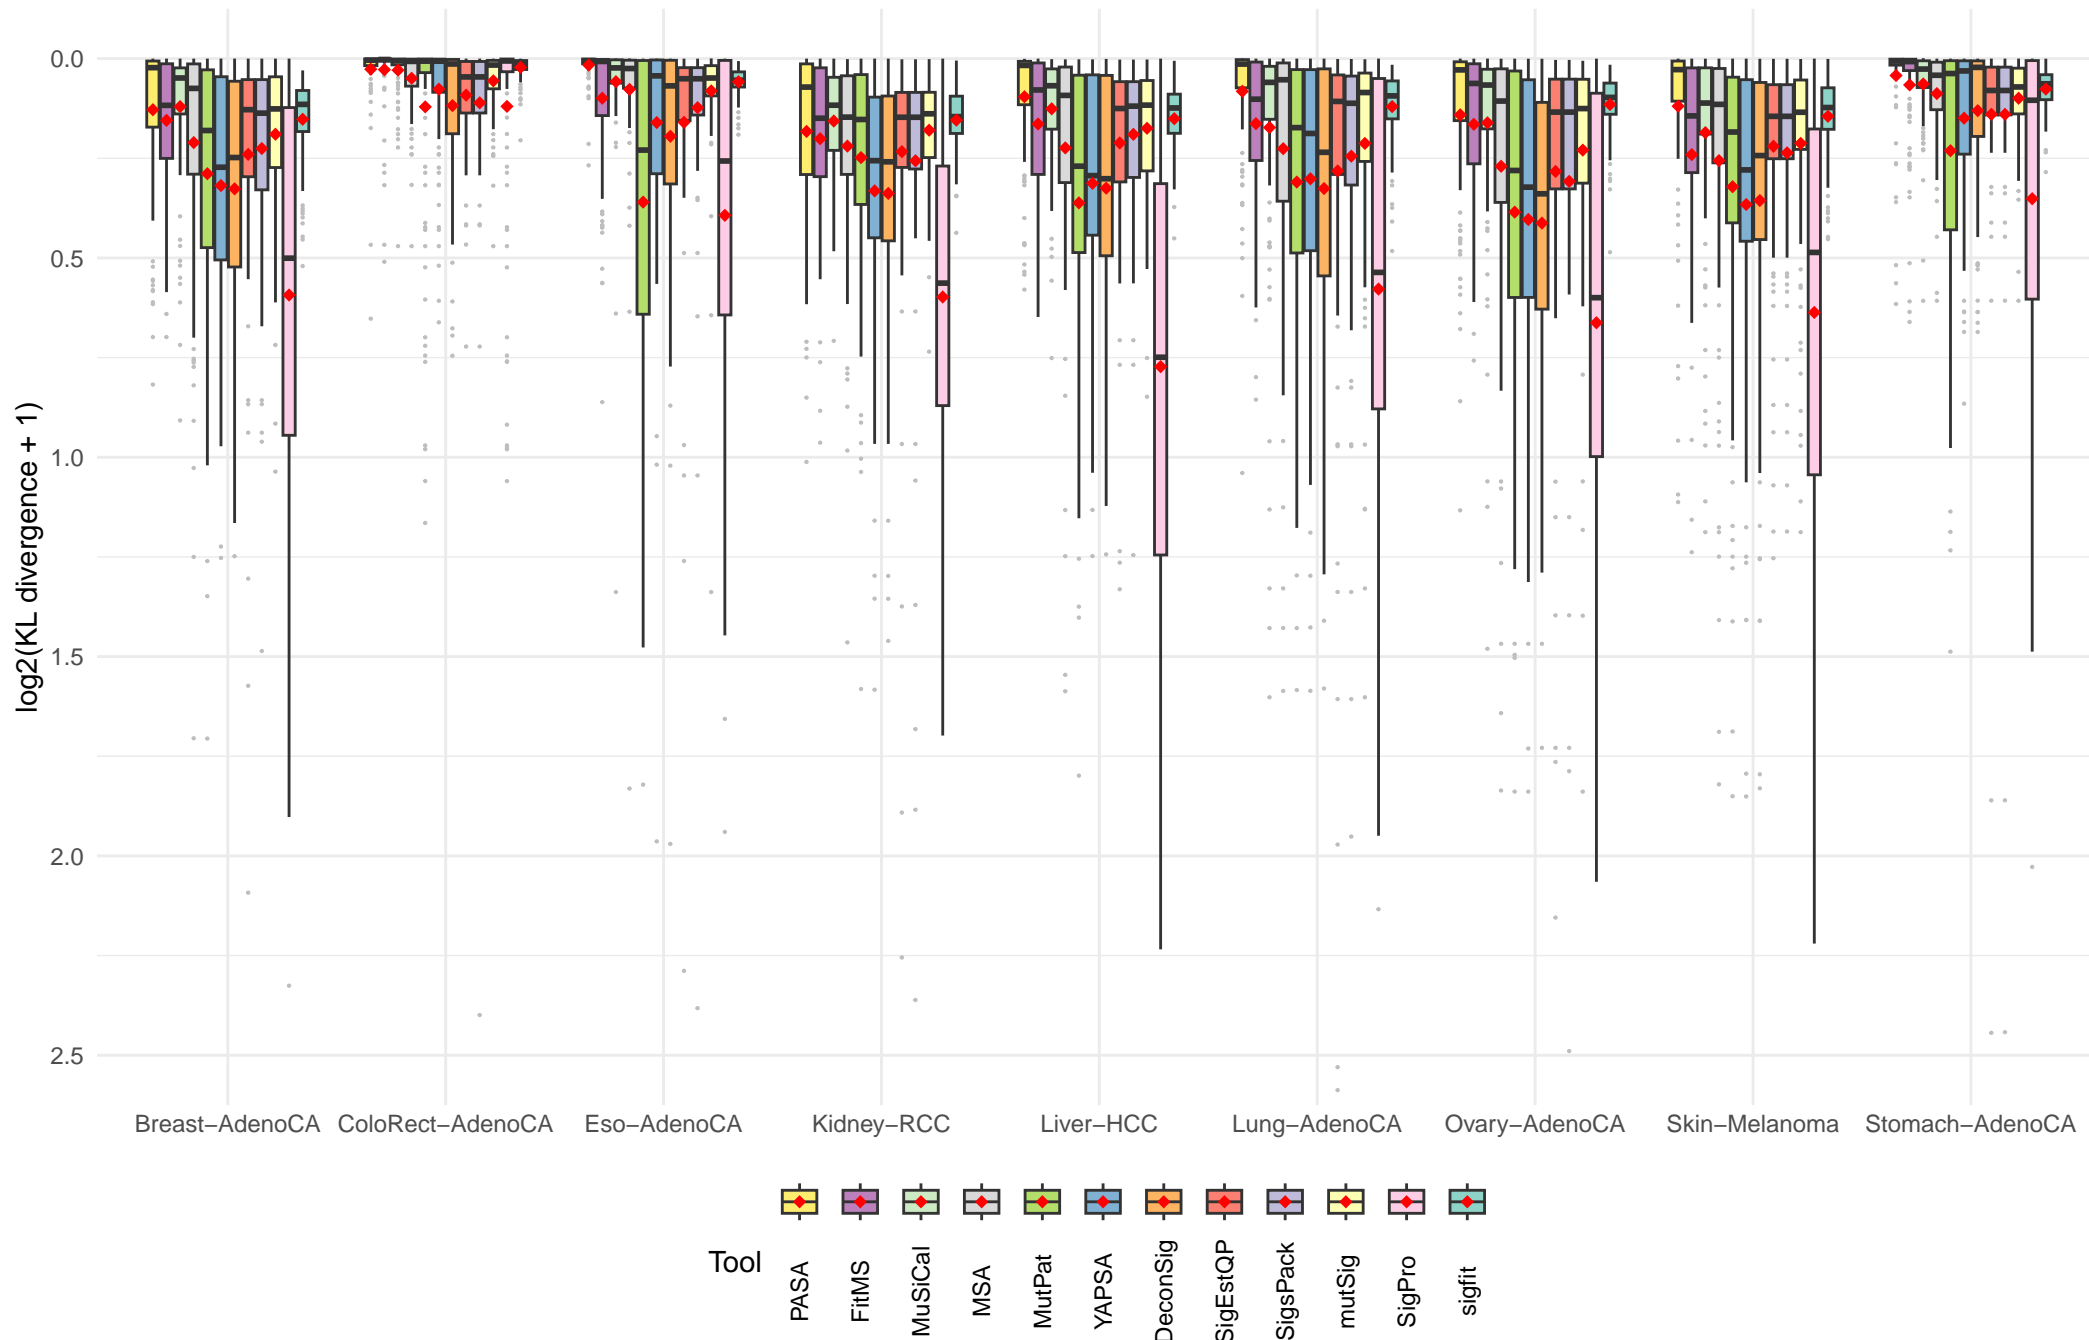

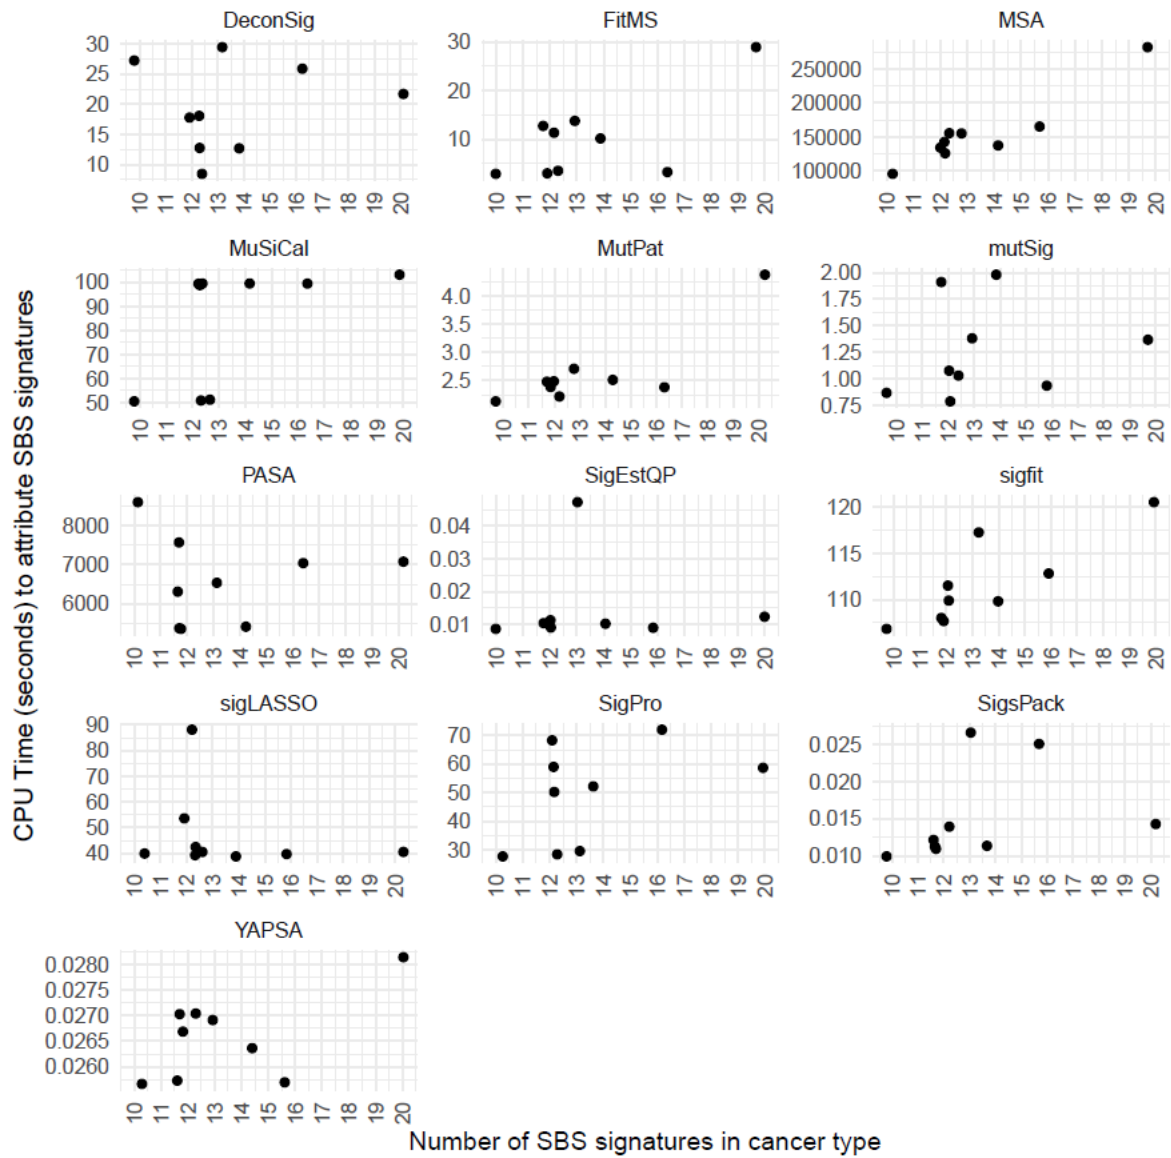

**Figure S8.** Relationships between CPU time and the number of SBS mutational signatures considered for each cancer type. Each dot represents one cancer type. For each signature attribution approach, Table S19 shows statistical analyses of the correlation between running time and the numbers of signatures considered for each cancer type.

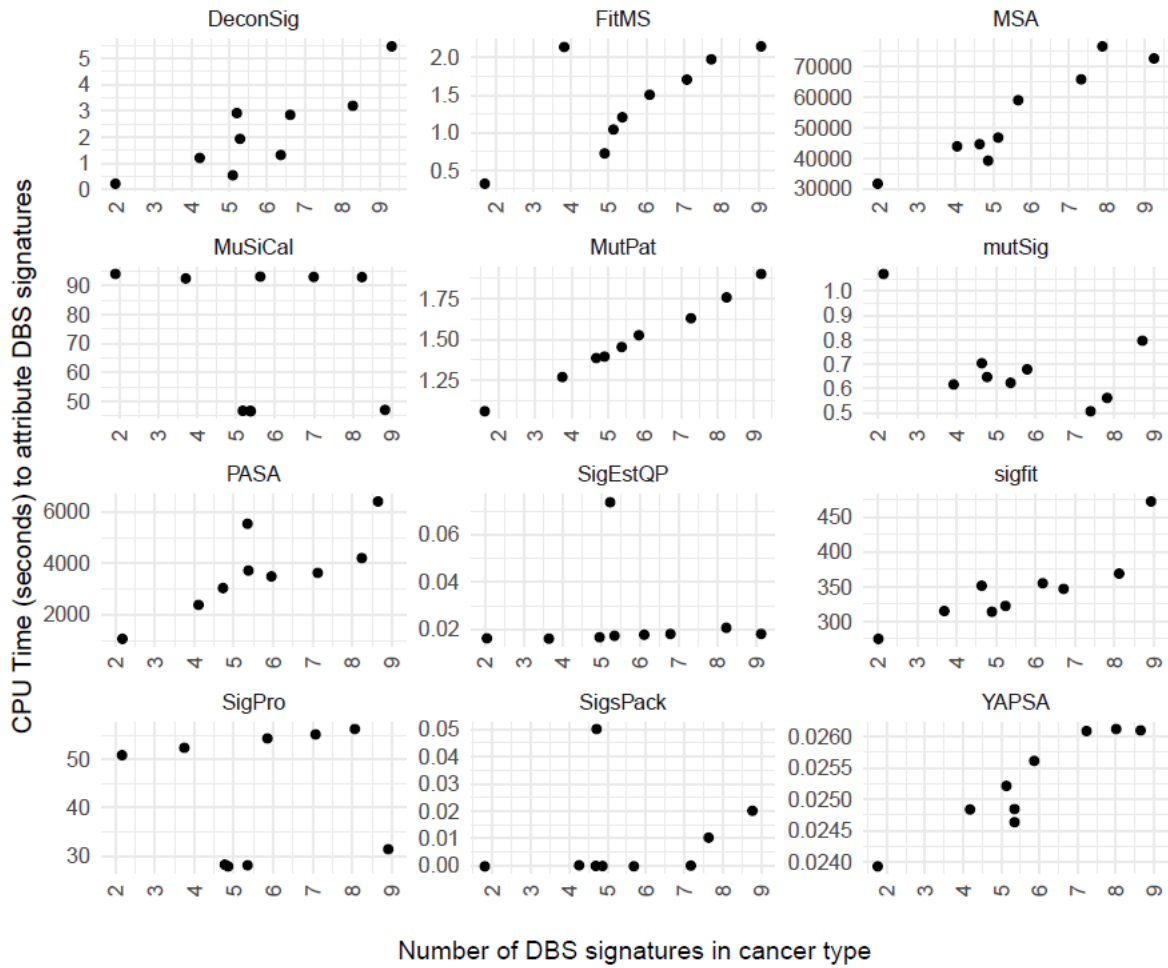

**Figure S9.** Relationships between CPU time and the number of DBS mutational signatures considered for each cancer type. Each dot represents one cancer type. For each signature attribution approach, Table S19 shows statistical analyses of the correlation between running time and the numbers of signatures considered for each cancer type.

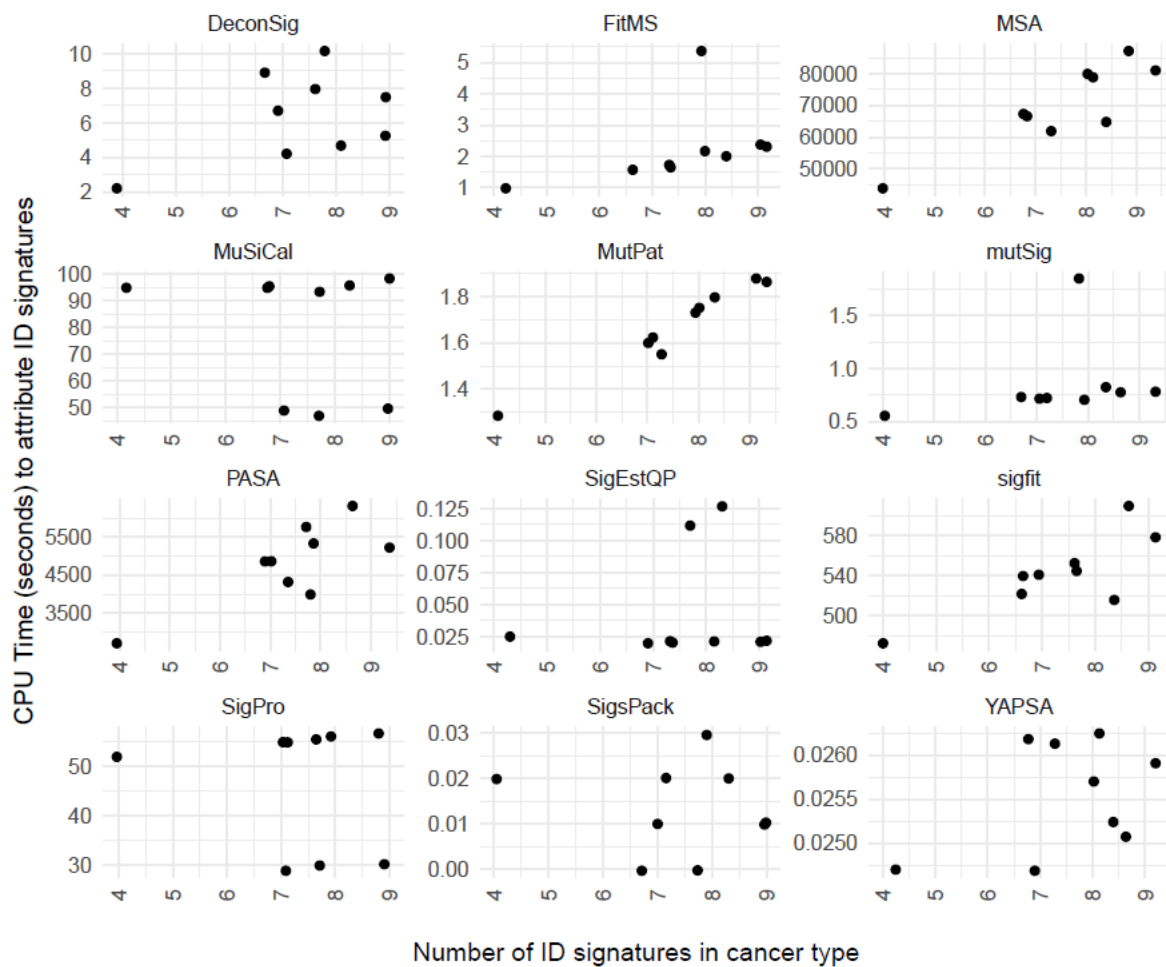

**Figure S10.** Relationships between CPU time and the number of ID mutational signatures considered for each cancer type. Each dot represents one cancer type. For each signature attribution approach, Table S19 shows statistical analyses of the correlation between running time and the numbers of signatures considered for each cancer type.
